# Supplementary material for: Bifidobacterium lactis Probio-M8 Adjuvant Treatment Confers Added Benefits to Patients with Coronary Artery Disease via Target Modulation of the Gut-Heart/-Brain Axes
Source: PubMed Central journal article supplement (PMC9040731; doi:10.1128/msystems.00100-22), 2022-03-28

pla\_0 pro\_0 pla\_90 pro\_90 pla\_180 pro\_180

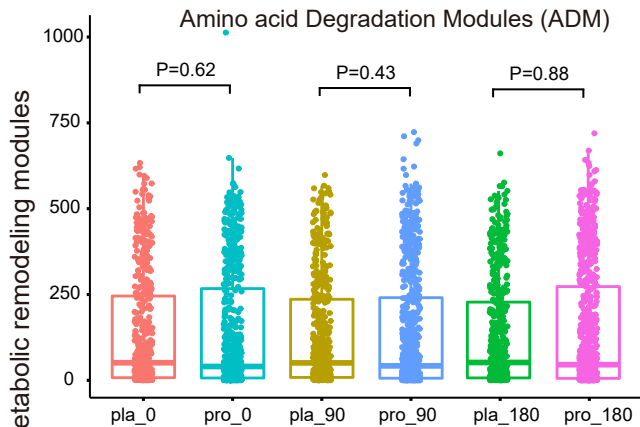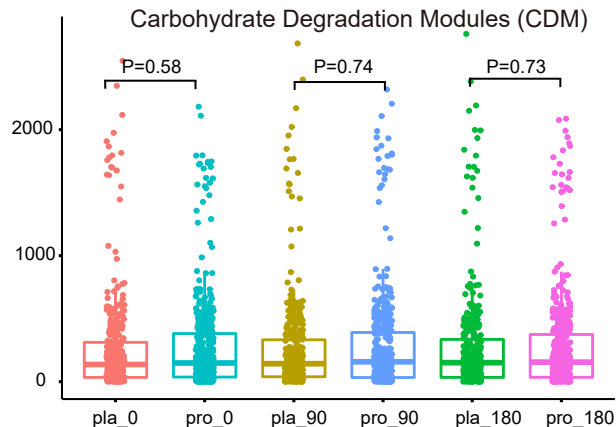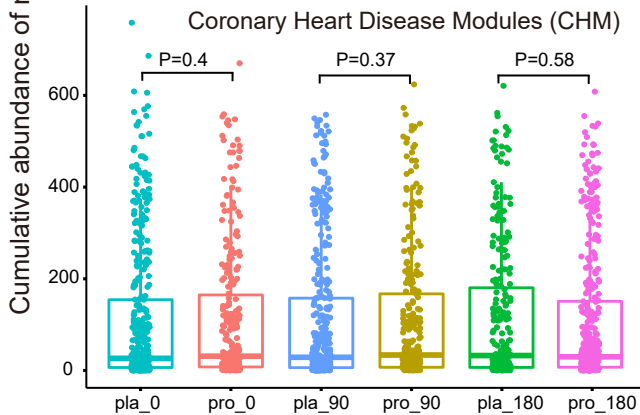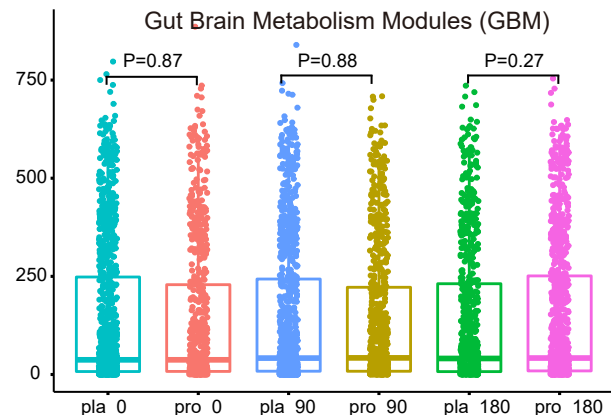

Supplement: msystems.00100-22-sf002.pdf [file msystems.00100-22-sf002.pdf]
