# Supplementary material for: Bifidobacterium lactis Probio-M8 Adjuvant Treatment Confers Added Benefits to Patients with Coronary Artery Disease via Target Modulation of the Gut-Heart/-Brain Axes
Source: PubMed Central journal article supplement (PMC9040731; doi:10.1128/msystems.00100-22), 2022-03-28
Supplement: msystems.00100-22-st001.pdf [file msystems.00100-22-st001.pdf]

Table S1. Information of subjects and samples

| Subject number | Subject Information |        |     |            |                                                 |      |                                        |                 |                 | Demographic data of two groups |                     |                  |             |
|----------------|---------------------|--------|-----|------------|-------------------------------------------------|------|----------------------------------------|-----------------|-----------------|--------------------------------|---------------------|------------------|-------------|
|                | Sample_ID           | Gender | Age | Group      | Group_time<br>(pro: probiotic;<br>pla: placebo) | BMI  | Atorvastatin<br>daily dosage<br>(mg/d) | Fecal<br>sample | Serum<br>sample |                                | Probiotics<br>group | Placebo<br>group | P-<br>value |
| 1              | Sample_A01_1        |        |     |            | pro_0d                                          |      |                                        | √               | √               | Male                           | 16                  | 20               | -           |
|                | Sample_A01_2        | F      | 74  | Probiotics | pro_90d                                         | 28.6 | 20                                     | √               | √               | Female                         | 10                  | 14               | -           |
|                | Sample_A01_3        |        |     |            | pro_180d                                        |      |                                        | √               | √               | Age                            | 65.11±8.14          | 66.29±10.31      | 0.93        |
| 2              | Sample_A02_1        |        |     |            | pro_0d                                          |      |                                        | √               | √               | BMI                            | 25.11±2.27          | 25.56±2.04       | 0.27        |
|                | Sample_A02_2        | M      | 65  | Probiotics | pro_90d                                         | 23.7 | 20                                     | √               | √               |                                |                     |                  |             |
|                | Sample_A02_3        |        |     |            | pro_180d                                        |      |                                        | √               | √               |                                |                     |                  |             |
| 3              | Sample_A03_1        |        |     |            | pro_0d                                          |      |                                        | √               | √               |                                |                     |                  |             |
|                | Sample_A03_2        | M      | 63  | Probiotics | pro_90d                                         | 23.1 | 20                                     | √               | √               |                                |                     |                  |             |
|                | Sample_A03_3        |        |     |            | pro_180d                                        |      |                                        | √               | √               |                                |                     |                  |             |
| 4              | Sample_A04_1        |        |     |            | pro_0d                                          |      |                                        | √               | √               |                                |                     |                  |             |
|                | Sample_A04_2        | F      | 61  | Probiotics | pro_90d                                         | 28.6 | 20                                     | √               | √               |                                |                     |                  |             |
|                | Sample_A04_3        |        |     |            | pro_180d                                        |      |                                        | √               | √               |                                |                     |                  |             |
| 5              | Sample_A05_1        |        |     |            | pro_0d                                          |      |                                        | √               | √               |                                |                     |                  |             |
|                | Sample_A05_2        | F      | 66  | Probiotics | pro_90d                                         | 26.2 | 20                                     | √               | √               |                                |                     |                  |             |
|                | Sample_A05_3        |        |     |            | pro_180d                                        |      |                                        | √               | √               |                                |                     |                  |             |
| 6              | Sample_A06_1        |        |     |            | pro_0d                                          |      |                                        | √               | √               |                                |                     |                  |             |
|                | Sample_A06_2        | M      | 66  | Probiotics | pro_90d                                         | 32.9 | 20                                     | √               | √               |                                |                     |                  |             |
|                | Sample_A06_3        |        |     |            | pro_180d                                        |      |                                        | √               | √               |                                |                     |                  |             |
| 7              | Sample_A07_1        |        |     |            | pro_0d                                          |      |                                        | √               | √               |                                |                     |                  |             |
|                | Sample_A07_2        | M      | 74  | Probiotics | pro_90d                                         | 24.3 | 20                                     | √               | √               |                                |                     |                  |             |
|                | Sample_A07_3        |        |     |            | pro_180d                                        |      |                                        | √               | √               |                                |                     |                  |             |
| 8              | Sample_A08_1        |        |     |            | pro_0d                                          |      |                                        | -               | -               |                                |                     |                  |             |
|                | Sample_A08_2        | M      | 73  | Probiotics | pro_90d                                         | 24.7 | 20                                     | -               | -               |                                |                     |                  |             |

|    |              |   |    |            |          |      |    |   |   |
|----|--------------|---|----|------------|----------|------|----|---|---|
|    | Sample_A08_3 |   |    |            | pro_180d |      |    | - | - |
|    | Sample_A09_1 |   |    |            | pro_0d   |      |    | √ | √ |
| 9  | Sample_A09_2 | M | 66 | Probiotics | pro_90d  | 22.5 | 20 | √ | √ |
|    | Sample_A09_3 |   |    |            | pro_180d |      |    | √ | √ |
|    | Sample_A10_1 |   |    |            | pro_0d   |      |    | - | - |
| 10 | Sample_A10_2 | M | 70 | Probiotics | pro_90d  | 24.4 | 20 | - | - |
|    | Sample_A10_3 |   |    |            | pro_180d |      |    | - | - |
|    | Sample_A11_1 |   |    |            | pro_0d   |      |    | - | - |
| 11 | Sample_A11_2 | M | 68 | Probiotics | pro_90d  | 24.5 | 20 | - | - |
|    | Sample_A11_3 |   |    |            | pro_180d |      |    | - | - |
|    | Sample_A12_1 |   |    |            | pro_0d   |      |    | √ | √ |
| 12 | Sample_A12_2 | F | 67 | Probiotics | pro_90d  | 24.2 | 20 | √ | √ |
|    | Sample_A12_3 |   |    |            | pro_180d |      |    | √ | √ |
|    | Sample_A13_1 |   |    |            | pro_0d   |      |    | - | - |
| 13 | Sample_A13_2 | M | 69 | Probiotics | pro_90d  | 25.4 | 20 | - | - |
|    | Sample_A13_3 |   |    |            | pro_180d |      |    | - | - |
|    | Sample_A14_1 |   |    |            | pro_0d   |      |    | - | - |
| 14 | Sample_A14_2 | M | 67 | Probiotics | pro_90d  | 26.1 | 20 | - | - |
|    | Sample_A14_3 |   |    |            | pro_180d |      |    | - | - |
|    | Sample_A15_1 |   |    |            | pro_0d   |      |    | - | - |
| 15 | Sample_A15_2 | M | 50 | Probiotics | pro_90d  | 25.5 | 20 | - | - |
|    | Sample_A15_3 |   |    |            | pro_180d |      |    | - | - |
|    | Sample_A16_1 |   |    |            | pro_0d   |      |    | - | - |
| 16 | Sample_A16_2 | F | 58 | Probiotics | pro_90d  | 23.4 | 20 | - | - |
|    | Sample_A16_3 |   |    |            | pro_180d |      |    | - | - |
|    | Sample_A17_1 |   |    |            | pro_0d   |      |    | √ | √ |
| 17 | Sample_A17_2 | F | 62 | Probiotics | pro_90d  | 24.1 | 20 | √ | √ |
|    | Sample_A17_3 |   |    |            | pro_180d |      |    | √ | √ |
|    | Sample_A18_1 |   |    |            | pro_0d   |      |    | √ | √ |
| 18 | Sample_A18_2 | M | 66 | Probiotics | pro_90d  | 25.3 | 20 | √ | √ |
|    | Sample_A18_3 |   |    |            | pro_180d |      |    | √ | √ |

|    |              |   |    |            |          |      |    |   |   |
|----|--------------|---|----|------------|----------|------|----|---|---|
|    | Sample_A19_1 |   |    |            | pro_0d   |      |    | √ | √ |
| 19 | Sample_A19_2 | F | 69 | Probiotics | pro_90d  | 27.3 | 20 | √ | √ |
|    | Sample_A19_3 |   |    |            | pro_180d |      |    | √ | √ |
|    | Sample_A20_1 |   |    |            | pro_0d   |      |    | - | - |
| 20 | Sample_A20_2 | F | 66 | Probiotics | pro_90d  | 23.3 | 20 | - | - |
|    | Sample_A20_3 |   |    |            | pro_180d |      |    | - | - |
|    | Sample_A21_1 |   |    |            | pro_0d   |      |    | √ | √ |
| 21 | Sample_A21_2 | F | 76 | Probiotics | pro_90d  | 22.7 | 20 | √ | √ |
|    | Sample_A21_3 |   |    |            | pro_180d |      |    | √ | √ |
|    | Sample_A22_1 |   |    |            | pro_0d   |      |    | √ | √ |
| 22 | Sample_A22_2 | M | 71 | Probiotics | pro_90d  | 27.1 | 20 | √ | √ |
|    | Sample_A22_3 |   |    |            | pro_180d |      |    | √ | √ |
|    | Sample_A23_1 |   |    |            | pro_0d   |      |    | √ | √ |
| 23 | Sample_A23_2 | F | 83 | Probiotics | pro_90d  | 23.9 | 20 | √ | √ |
|    | Sample_A23_3 |   |    |            | pro_180d |      |    | √ | √ |
|    | Sample_A24_1 |   |    |            | pro_0d   |      |    | √ | √ |
| 24 | Sample_A24_2 | M | 60 | Probiotics | pro_90d  | 22.4 | 20 | √ | √ |
|    | Sample_A24_3 |   |    |            | pro_180d |      |    | √ | √ |
|    | Sample_A25_1 |   |    |            | pro_0d   |      |    | - | - |
| 25 | Sample_A25_2 | M | 66 | Probiotics | pro_90d  | 23.8 | 20 | - | - |
|    | Sample_A25_3 |   |    |            | pro_180d |      |    | - | - |
|    | Sample_A26_1 |   |    |            | pro_0d   |      |    | - | - |
| 26 | Sample_A26_2 | F | 75 | Probiotics | pro_90d  | 23.2 | 20 | - | - |
|    | Sample_A26_3 |   |    |            | pro_180d |      |    | - | - |
|    | Sample_A27_1 |   |    |            | pro_0d   |      |    | √ | √ |
| 27 | Sample_A27_2 | F | 66 | Probiotics | pro_90d  | 24.1 | 20 | √ | √ |
|    | Sample_A27_3 |   |    |            | pro_180d |      |    | √ | √ |
|    | Sample_A28_1 |   |    |            | pro_0d   |      |    | √ | √ |
| 28 | Sample_A28_2 | M | 65 | Probiotics | pro_90d  | 24.7 | 20 | √ | √ |
|    | Sample_A28_3 |   |    |            | pro_180d |      |    | √ | √ |
|    | Sample_A29_1 |   |    |            | pro_0d   |      |    | √ | √ |

|    |              |   |    |            |          |      |    |   |   |
|----|--------------|---|----|------------|----------|------|----|---|---|
| 29 | Sample_A29_2 | M | 50 | Probiotics | pro_90d  | 24.2 | 20 | √ | √ |
|    | Sample_A29_3 |   |    |            | pro_180d |      |    | √ | √ |
|    | Sample_A30_1 |   |    |            | pro_0d   |      |    | √ | √ |
| 30 | Sample_A30_2 | F | 50 | Probiotics | pro_90d  | 27.3 | 20 | √ | √ |
|    | Sample_A30_3 |   |    |            | pro_180d |      |    | √ | √ |
|    | Sample_A31_1 |   |    |            | pro_0d   |      |    | √ | √ |
| 31 | Sample_A31_2 | M | 50 | Probiotics | pro_90d  | 29.1 | 20 | √ | √ |
|    | Sample_A31_3 |   |    |            | pro_180d |      |    | √ | √ |
|    | Sample_A32_1 |   |    |            | pro_0d   |      |    | √ | √ |
| 32 | Sample_A32_2 | M | 52 | Probiotics | pro_90d  | 26.1 | 20 | √ | √ |
|    | Sample_A32_3 |   |    |            | pro_180d |      |    | √ | √ |
|    | Sample_A33_1 |   |    |            | pro_0d   |      |    | √ | √ |
| 33 | Sample_A33_2 | M | 54 | Probiotics | pro_90d  | 25.4 | 20 | √ | √ |
|    | Sample_A33_3 |   |    |            | pro_180d |      |    | √ | √ |
|    | Sample_A34_1 |   |    |            | pro_0d   |      |    | - | - |
| 34 | Sample_A34_2 | F | 62 | Probiotics | pro_90d  | 21.1 | 20 | - | - |
|    | Sample_A34_3 |   |    |            | pro_180d |      |    | - | - |
|    | Sample_A35_1 |   |    |            | pro_0d   |      |    | - | - |
| 35 | Sample_A35_2 | F | 68 | Probiotics | pro_90d  | 26.4 | 20 | - | - |
|    | Sample_A35_3 |   |    |            | pro_180d |      |    | - | - |
|    | Sample_A36_1 |   |    |            | pro_0d   |      |    | √ | √ |
| 36 | Sample_A36_2 | F | 76 | Probiotics | pro_90d  | 24.3 | 20 | √ | √ |
|    | Sample_A36_3 |   |    |            | pro_180d |      |    | √ | √ |
|    | Sample_B01_1 |   |    |            | pla_0d   |      |    | - | - |
| 37 | Sample_B01_2 | F | 74 | Placebo    | pla_90d  | 25.4 | 20 | - | - |
|    | Sample_B01_3 |   |    |            | pla_180d |      |    | - | - |
|    | Sample_B02_1 |   |    |            | pla_0d   |      |    | √ | √ |
| 38 | Sample_B02_2 | F | 59 | Placebo    | pla_90d  | 28.1 | 20 | √ | √ |
|    | Sample_B02_3 |   |    |            | pla_180d |      |    | √ | √ |
|    | Sample_B03_1 |   |    |            | pla_0d   |      |    | √ | √ |
| 39 | Sample_B03_2 | M | 59 | Placebo    | pla_90d  | 25.8 | 20 | √ | √ |

|    |              |   |    |         |          |      |    |   |   |
|----|--------------|---|----|---------|----------|------|----|---|---|
|    | Sample_B03_3 |   |    |         | pla_180d |      |    | √ | √ |
|    | Sample_B04_1 |   |    |         | pla_0d   |      |    | - | - |
| 40 | Sample_B04_2 | M | 63 | Placebo | pla_90d  | 24.9 | 20 | - | - |
|    | Sample_B04_3 |   |    |         | pla_180d |      |    | - | - |
|    | Sample_B05_1 |   |    |         | pla_0d   |      |    | √ | √ |
| 41 | Sample_B05_2 | M | 64 | Placebo | pla_90d  | 28.2 | 20 | √ | √ |
|    | Sample_B05_3 |   |    |         | pla_180d |      |    | √ | √ |
|    | Sample_B06_1 |   |    |         | pla_0d   |      |    | √ | √ |
| 42 | Sample_B06_2 | F | 82 | Placebo | pla_90d  | 28.5 | 20 | √ | √ |
|    | Sample_B06_3 |   |    |         | pla_180d |      |    | √ | √ |
|    | Sample_B07_1 |   |    |         | pla_0d   |      |    | - | - |
| 43 | Sample_B07_2 | F | 74 | Placebo | pla_90d  | 27   | 20 | - | - |
|    | Sample_B07_3 |   |    |         | pla_180d |      |    | - | - |
|    | Sample_B08_1 |   |    |         | pla_0d   |      |    | - | - |
| 44 | Sample_B08_2 | M | 54 | Placebo | pla_90d  | 27.8 | 20 | - | - |
|    | Sample_B08_3 |   |    |         | pla_180d |      |    | - | - |
|    | Sample_B09_1 |   |    |         | pla_0d   |      |    | - | - |
| 45 | Sample_B09_2 | M | 47 | Placebo | pla_90d  | 21.1 | 20 | - | - |
|    | Sample_B09_3 |   |    |         | pla_180d |      |    | - | - |
|    | Sample_B10_1 |   |    |         | pla_0d   |      |    | - | - |
| 46 | Sample_B10_2 | M | 47 | Placebo | pla_90d  | 26.3 | 20 | - | - |
|    | Sample_B10_3 |   |    |         | pla_180d |      |    | - | - |
|    | Sample_B11_1 |   |    |         | pla_0d   |      |    | √ | √ |
| 47 | Sample_B11_2 | F | 63 | Placebo | pla_90d  | 23.9 | 20 | √ | √ |
|    | Sample_B11_3 |   |    |         | pla_180d |      |    | √ | √ |
|    | Sample_B12_1 |   |    |         | pla_0d   |      |    | √ | √ |
| 48 | Sample_B12_2 | F | 77 | Placebo | pla_90d  | 24.6 | 20 | √ | √ |
|    | Sample_B12_3 |   |    |         | pla_180d |      |    | √ | √ |
|    | Sample_B13_1 |   |    |         | pla_0d   |      |    | √ | √ |
| 49 | Sample_B13_2 | F | 78 | Placebo | pla_90d  | 27.1 | 20 | √ | √ |
|    | Sample_B13_3 |   |    |         | pla_180d |      |    | √ | √ |

|    |              |   |    |         |          |      |    |   |   |
|----|--------------|---|----|---------|----------|------|----|---|---|
|    | Sample_B14_1 |   |    |         | pla_0d   |      |    | √ | √ |
| 50 | Sample_B14_2 | M | 68 | Placebo | pla_90d  | 27.3 | 20 | √ | √ |
|    | Sample_B14_3 |   |    |         | pla_180d |      |    | √ | √ |
|    | Sample_B15_1 |   |    |         | pla_0d   |      |    | √ | √ |
| 51 | Sample_B15_2 | M | 73 | Placebo | pla_90d  | 26.1 | 20 | √ | √ |
|    | Sample_B15_3 |   |    |         | pla_180d |      |    | √ | √ |
|    | Sample_B16_1 |   |    |         | pla_0d   |      |    | √ | √ |
| 52 | Sample_B16_2 | M | 80 | Placebo | pla_90d  | 25.3 | 20 | √ | √ |
|    | Sample_B16_3 |   |    |         | pla_180d |      |    | √ | √ |
|    | Sample_B17_1 |   |    |         | pla_0d   |      |    | √ | √ |
| 53 | Sample_B17_2 | M | 57 | Placebo | pla_90d  | 28.6 | 20 | √ | √ |
|    | Sample_B17_3 |   |    |         | pla_180d |      |    | √ | √ |
|    | Sample_B18_1 |   |    |         | pla_0d   |      |    | √ | √ |
| 54 | Sample_B18_2 | F | 78 | Placebo | pla_90d  | 25.1 | 20 | √ | √ |
|    | Sample_B18_3 |   |    |         | pla_180d |      |    | √ | √ |
|    | Sample_B19_1 |   |    |         | pla_0d   |      |    | - | - |
| 55 | Sample_B19_2 | M | 63 | Placebo | pla_90d  | 23.2 | 20 | - | - |
|    | Sample_B19_3 |   |    |         | pla_180d |      |    | - | - |
|    | Sample_B20_1 |   |    |         | pla_0d   |      |    | √ | √ |
| 56 | Sample_B20_2 | M | 60 | Placebo | pla_90d  | 23.5 | 20 | √ | √ |
|    | Sample_B20_3 |   |    |         | pla_180d |      |    | √ | √ |
|    | Sample_B21_1 |   |    |         | pla_0d   |      |    | √ | √ |
| 57 | Sample_B21_2 | F | 82 | Placebo | pla_90d  | 24.2 | 20 | √ | √ |
|    | Sample_B21_3 |   |    |         | pla_180d |      |    | √ | √ |
|    | Sample_B22_1 |   |    |         | pla_0d   |      |    | √ | √ |
| 58 | Sample_B22_2 | M | 65 | Placebo | pla_90d  | 22.6 | 20 | √ | √ |
|    | Sample_B22_3 |   |    |         | pla_180d |      |    | √ | √ |
|    | Sample_B23_1 |   |    |         | pla_0d   |      |    | √ | √ |
| 59 | Sample_B23_2 | M | 63 | Placebo | pla_90d  | 23   | 20 | √ | √ |
|    | Sample_B23_3 |   |    |         | pla_180d |      |    | √ | √ |
|    | Sample_B24_1 |   |    |         | pla_0d   |      |    | √ | √ |

|    |              |   |    |         |          |      |    |   |   |
|----|--------------|---|----|---------|----------|------|----|---|---|
| 60 | Sample_B24_2 | F | 61 | Placebo | pla_90d  | 25.8 | 20 | √ | √ |
|    | Sample_B24_3 |   |    |         | pla_180d |      |    | √ | √ |
