# Supplementary material for: Bifidobacterium lactis Probio-M8 Adjuvant Treatment Confers Added Benefits to Patients with Coronary Artery Disease via Target Modulation of the Gut-Heart/-Brain Axes
Source: PubMed Central journal article supplement (PMC9040731; doi:10.1128/msystems.00100-22), 2022-03-28
Supplement: msystems.00100-22-st002.pdf [file msystems.00100-22-st002.pdf]

Table S2. Information of multiple reaction monitoring-ion pair channel of detected metabolites of coronary artery diseases

Remarks: #Q1 represent the parent ion of compound; \*Q3 represent the daughter ion of the compound

| Metabolites          | Abbreviation of metabolites | Q1# (m/z) | Q3* (m/z) | De-clustering potential (DP; V) | Collision energy (CE; V) |
|----------------------|-----------------------------|-----------|-----------|---------------------------------|--------------------------|
| Trimethylamine oxide | TMAO                        | 75.9      | 58.2      | 29.21                           | 23.05                    |
| Trimethylamine       | TMA                         | 59.9      | 44.4      | 33.77                           | 29.6                     |
| Lysine               | Lys                         | 147       | 84.1      | 28.3                            | 21.61                    |
| Alanine              | Ala                         | 90.1      | 44.1      | 65.06                           | 15.93                    |
| Isoleucine           | Ile                         | 131.9     | 69        | 20.79                           | 22.81                    |
| Serine               | Ser                         | 105.8     | 60.1      | 33.98                           | 13.37                    |
| Tryptophan           | Trp                         | 204.9     | 115       | 14.08                           | 46.75                    |
| Phenylalanine        | Pha                         | 166       | 120.1     | 27.84                           | 7.1                      |
| Leucine              | Leu                         | 132       | 86.1      | 13.88                           | 13.27                    |
| Glycine              | Gly                         | 76.1      | 30        | 10                              | 20.06                    |
| Glutamine            | Gln                         | 147       | 130       | 11.45                           | 12.97                    |
| Threonine            | Thr                         | 120.1     | 74        | 16.03                           | 13.29                    |
| Valine               | Val                         | 117.8     | 72        | 34.12                           | 13.39                    |
| Histidine            | His                         | 156.1     | 110       | 32                              | 17.93                    |
| Proline              | Pro                         | 115.8     | 70.1      | 51.14                           | 26.73                    |
| Amino oxalic acid    | DL-2                        | 161.9     | 97.9      | 16.92                           | 20.18                    |
| Asparagine           | Asn                         | 133.1     | 74        | 24.03                           | 19.21                    |
| Cystine              | Cys-cys                     | 240.9     | 152.1     | 40.11                           | 18.34                    |
| Aspartic acid        | Asp                         | 134.1     | 73.9      | 16.26                           | 17.97                    |
| Citrulline           | Ccp                         | 176.1     | 159.2     | 26.01                           | 12.91                    |
| Arginine             | Arg                         | 175.2     | 69.9      | 43.85                           | 25.02                    |
| Methionine           | Met                         | 150       | 103.8     | 15.74                           | 13.9                     |
| Cysteine             | Cys-2                       | 122.2     | 76        | 17.17                           | 17.04                    |
| Kynurenine           | Kyn                         | 209.1     | 94.1      | 28.77                           | 18.21                    |
| Tyrosine             | Tyr                         | 182.1     | 165.1     | 13.81                           | 12.65                    |
