# Supplementary material for: Bifidobacterium lactis Probio-M8 Adjuvant Treatment Confers Added Benefits to Patients with Coronary Artery Disease via Target Modulation of the Gut-Heart/-Brain Axes
Source: PubMed Central journal article supplement (PMC9040731; doi:10.1128/msystems.00100-22), 2022-03-28
Supplement: msystems.00100-22-st003.pdf [file msystems.00100-22-st003.pdf]

Table S3. Clinical indicators for coronary artery disease measured before and after the trial (n=60)

|                              | Probiotic group   |                |           |             |                           | Placebo group     |                |           |             |                           | Probiotic vs Placebo                |                                       |
|------------------------------|-------------------|----------------|-----------|-------------|---------------------------|-------------------|----------------|-----------|-------------|---------------------------|-------------------------------------|---------------------------------------|
|                              | Result statistics |                |           |             | Corrected P-value, T-test | Result statistics |                |           |             | Corrected P-value, T-test | 0d Corrected P-value, Wilcoxon-test | 180d Corrected P-value, Wilcoxon-test |
| Differential indicators      | Mean_p ro_0d      | Mean_p ro_180d | SD_pro_0d | SD_pro_180d | pro_0d vs pro_180d        | Mean_p la_0d      | Mean_p la_180d | SD_pla_0d | SD_pla_180d | pla_0d vs pla_180d        | 0d                                  | 180d                                  |
| Anginal Frequency            | 49.89             | 71.00          | 7.46      | 7.04        | <2E-16                    | 46.84             | 62.83          | 5.41      | 5.45        | 5.50E-11                  | 0.10                                | 3.00E-05                              |
| Anginal Stability            | 43.13             | 62.25          | 4.90      | 6.66        | <2E-16                    | 42.53             | 55.07          | 5.38      | 5.23        | 2.00E-12                  | 0.66                                | 1.90E-04                              |
| Disease Perception           | 43.03             | 65.60          | 4.04      | 4.53        | <2E-16                    | 43.44             | 66.87          | 5.22      | 5.00        | 7.00E-13                  | 0.82                                | 1.90E-01                              |
| Physical Limitation          | 43.60             | 67.18          | 4.38      | 5.79        | <2E-16                    | 45.86             | 57.59          | 5.89      | 5.98        | 3.90E-12                  | 0.15                                | 9.70E-07                              |
| Treatment Satisfaction       | 44.03             | 69.47          | 4.53      | 4.95        | <2E-16                    | 43.78             | 64.32          | 4.31      | 5.02        | 2.90E-13                  | 0.93                                | 9.00E-04                              |
| Self-rating Anxiety Scale    | 46.38             | 38.38          | 4.86      | 4.06        | 2.00E-11                  | 48.16             | 42.10          | 4.09      | 3.51        | 1.50E-09                  | 0.15                                | 1.90E-04                              |
| Self-rating Depression Scale | 50.28             | 39.27          | 5.16      | 4.28        | 2.80E-16                  | 50.54             | 46.72          | 3.66      | 4.02        | 0.0015                    | 0.49                                | 2.30E-07                              |
| Interleukin-6 (pg/mL)        | 46.19             | 30.77          | 5.08      | 4.64        | <2E-16                    | 45.97             | 34.59          | 4.47      | 3.22        | 3.30E-11                  | 0.89                                | 1.50E-03                              |

|                                              |       |       |       |       |        |       |       |       |       |          |      |          |
|----------------------------------------------|-------|-------|-------|-------|--------|-------|-------|-------|-------|----------|------|----------|
| Low-density lipoprotein cholesterol (mmol/L) | 3.41  | 2.13  | 0.38  | 0.19  | <2E-16 | 3.57  | 2.62  | 0.24  | 0.19  | 4.30E-16 | 0.23 | 1.60E-10 |
| Cereal third transaminase (u/L)              | 21.92 | 22.79 | 14.73 | 12.26 | 1      | 23.98 | 23.42 | 15.22 | 11.16 | 1        | 1    | 1        |
| Blood urea nitrogen (mmol/L)                 | 5.28  | 5.13  | 1.27  | 0.94  | 1      | 5.37  | 6.85  | 1.46  | 8.04  | 1        | 1    | 1        |
| Creatinine (ummol/L)                         | 60.49 | 60.58 | 12.93 | 10.59 | 1      | 68.89 | 68.31 | 21.49 | 18.44 | 0.78     | 0.78 | 0.78     |
| White blood cell count (*10^9/L)             | 5.91  | 5.93  | 1.47  | 1.16  | 1      | 5.91  | 6.23  | 1.41  | 0.92  | 0.49     | 1    | 0.49     |
