# Supplementary material for: Bifidobacterium lactis Probio-M8 Adjuvant Treatment Confers Added Benefits to Patients with Coronary Artery Disease via Target Modulation of the Gut-Heart/-Brain Axes
Source: PubMed Central journal article supplement (PMC9040731; doi:10.1128/msystems.00100-22), 2022-03-28
Supplement: msystems.00100-22-st004.pdf [file msystems.00100-22-st004.pdf]

|                    |           |     |      |        |       |        |        |      |                    |                |                                    |
|--------------------|-----------|-----|------|--------|-------|--------|--------|------|--------------------|----------------|------------------------------------|
| Sample_A02_2.bin_1 | A022.M001 | 40  | 4.69 | 171.34 | 53.85 | 249.75 | 99.28  | 0.30 | Enterobacteriaceae | Proteobacteria | Citrobacter koseri                 |
| Sample_A19_1.bin_1 | A191.M001 | 36  | 4.26 | 164.43 | 46.33 | 234.87 | 98.51  | 0.00 | Bacteroidales      | Bacteroidetes  | Bacteroides uniformis              |
| Sample_A32_1.bin_1 | A321.M001 | 29  | 2.66 | 159.61 | 41.62 | 216.80 | 98.63  | 0.00 | Lachnospiraceae    | Firmicutes     | Eubacterium rectale                |
| Sample_A24_1.bin_1 | A241.M001 | 96  | 2.87 | 39.84  | 50.62 | 211.49 | 98.42  | 0.12 | Bacteroidales      | Bacteroidetes  | Prevotella sp. CAG:520             |
| Sample_A24_2.bin_1 | A242.M001 | 43  | 1.99 | 61.96  | 59.96 | 199.93 | 93.95  | 1.17 | Clostridiales      | Firmicutes     | Clostridiales bacterium            |
| Sample_B22_2.bin_1 | B222.M001 | 38  | 5.47 | 236.78 | 57.43 | 175.54 | 98.80  | 0.92 | Enterobacteriaceae | Proteobacteria | Klebsiella pneumoniae              |
| Sample_B20_2.bin_1 | B202.M001 | 15  | 1.16 | 126.82 | 26.47 | 173.54 | 91.57  | 2.25 | Bacteria           | Firmicutes     | Firmicutes bacterium CAG:460       |
| Sample_A17_3.bin_1 | A173.M001 | 44  | 3.61 | 124.46 | 44.42 | 170.00 | 96.34  | 4.00 | Bacteroidales      | Bacteroidetes  | Bacteroides eggerthii              |
| Sample_A22_1.bin_1 | A221.M001 | 82  | 3.01 | 56.08  | 49.57 | 164.98 | 96.98  | 0.49 | Bacteroidales      | Bacteroidetes  | Prevotella sp. 885                 |
| Sample_A09_2.bin_1 | A092.M001 | 52  | 2.54 | 58.74  | 54.35 | 158.79 | 97.09  | 0.00 | Prevotella         | Bacteroidetes  | Prevotella sp.                     |
| Sample_B16_1.bin_1 | B161.M001 | 114 | 2.46 | 36.62  | 44.79 | 154.07 | 93.09  | 0.00 | Bacteroidales      | Bacteroidetes  | Prevotella sp. CAG:5226            |
| Sample_A31_1.bin_1 | A311.M001 | 16  | 2.81 | 262.18 | 43.20 | 152.76 | 97.65  | 0.00 | Clostridiales      | Firmicutes     | Coprococcus eutactus CAG:665       |
| Sample_A07_3.bin_1 | A073.M001 | 31  | 3.05 | 125.40 | 44.53 | 151.70 | 97.46  | 4.11 | Clostridiales      | Firmicutes     | uncultured Blautia sp.             |
| Sample_B16_3.bin_1 | B163.M001 | 39  | 3.28 | 110.47 | 46.07 | 149.11 | 91.09  | 0.00 | Bacteroidales      | Bacteroidetes  | Bacteroides stercoris              |
| Sample_A07_1.bin_1 | A071.M001 | 12  | 1.75 | 240.43 | 31.08 | 138.54 | 100.00 | 0.00 | Euryarchaeota      | Euryarchaeota  | Methanobrevibacter smithii CAG:186 |

|                    |           |     |      |        |       |        |       |      |                    |                |                               |
|--------------------|-----------|-----|------|--------|-------|--------|-------|------|--------------------|----------------|-------------------------------|
| Sample_A05_3.bin_1 | A053.M001 | 99  | 3.06 | 40.77  | 40.80 | 135.99 | 93.11 | 0.37 | Bacteroidales      | Bacteroidetes  | Bacteroides coprocola CAG:162 |
| Sample_A06_3.bin_1 | A063.M001 | 42  | 5.20 | 238.16 | 57.97 | 134.73 | 98.71 | 0.46 | Enterobacteriaceae | Proteobacteria | Klebsiella pneumoniae         |
| Sample_B14_2.bin_1 | B142.M001 | 21  | 1.87 | 220.85 | 43.82 | 134.00 | 97.31 | 0.00 | Clostridiales      | Firmicutes     | Anaerotruncus sp. CAG:528     |
| Sample_A33_1.bin_1 | A331.M001 | 103 | 3.16 | 43.50  | 43.19 | 133.89 | 96.41 | 0.63 | Clostridiales      | Firmicutes     | Clostridium sp. TM06-18       |
| Sample_B02_2.bin_1 | B022.M001 | 33  | 2.07 | 84.45  | 39.14 | 132.97 | 98.65 | 0.34 | Clostridiales      | Firmicutes     | Ruminococcaceae bacterium     |
| Sample_A30_2.bin_1 | A302.M001 | 57  | 2.71 | 80.73  | 46.78 | 132.70 | 97.98 | 0.67 | Clostridiales      | Firmicutes     | uncultured Ruminococcus sp.   |
| Sample_A17_2.bin_1 | A172.M001 | 79  | 3.36 | 72.91  | 51.19 | 131.62 | 98.64 | 0.34 | Prevotella         | Bacteroidetes  | Prevotella sp.                |
| Sample_B23_3.bin_1 | B233.M001 | 27  | 2.74 | 137.81 | 46.17 | 131.34 | 97.40 | 2.03 | Lachnospiraceae    | Firmicutes     | Clostridium sp. CAG:510       |
| Sample_A32_2.bin_1 | A322.M001 | 73  | 3.02 | 53.56  | 44.58 | 126.30 | 94.77 | 0.00 | Bacteroidales      | Bacteroidetes  | Bacteroides plebeius          |
| Sample_B21_1.bin_1 | B211.M001 | 20  | 2.68 | 230.00 | 42.96 | 126.21 | 91.94 | 2.68 | Clostridiales      | Firmicutes     | Coprococcus eutactus          |
| Sample_A02_3.bin_1 | A023.M001 | 47  | 2.74 | 95.76  | 35.26 | 122.87 | 90.26 | 3.58 | Clostridiales      | Firmicutes     | Lachnospiraceae bacterium     |
| Sample_A29_1.bin_1 | A291.M001 | 27  | 2.01 | 121.87 | 41.80 | 114.00 | 98.69 | 0.26 | Lactobacillales    | Firmicutes     | Lactobacillus agilis          |
| Sample_A18_2.bin_2 | A182.M002 | 86  | 2.82 | 52.64  | 48.27 | 112.61 | 96.66 | 0.12 | Bacteroidales      | Bacteroidetes  | Prevotella sp. CAG:592        |
| Sample_B11_1.bin_2 | B111.M002 | 29  | 2.58 | 151.27 | 48.57 | 112.43 | 99.36 | 0.00 | Clostridiales      | Firmicutes     | Clostridium sp. AM28-20LB     |
| Sample_B18_2.bin_2 | B182.M002 | 10  | 1.20 | 402.08 | 27.58 | 108.71 | 92.41 | 1.12 | Bacteria           | Firmicutes     | Clostridium sp. CAG:594       |

|                    |           |     |      |        |       |        |        |      |                    |                            |                                                |
|--------------------|-----------|-----|------|--------|-------|--------|--------|------|--------------------|----------------------------|------------------------------------------------|
| Sample_A06_3.bin_2 | A063.M002 | 28  | 1.40 | 128.67 | 28.02 | 105.66 | 80.16  | 2.45 | Clostridiales      | Firmicutes                 | Clostridiales bacterium                        |
| Sample_B02_1.bin_2 | B021.M002 | 58  | 2.42 | 56.75  | 58.41 | 103.60 | 91.27  | 1.34 | Clostridiales      | Firmicutes                 | Firmicutes bacterium CAG:124                   |
| Sample_A09_3.bin_2 | A093.M002 | 89  | 2.15 | 39.87  | 52.11 | 101.39 | 100.00 | 0.63 | Firmicutes         | Firmicutes                 | Dialister sp. CAG:486                          |
| Sample_A30_1.bin_2 | A301.M002 | 30  | 5.15 | 297.02 | 57.64 | 101.33 | 100.00 | 0.19 | Enterobacteriaceae | Proteobacteria             | Klebsiella pneumoniae                          |
| Sample_A33_1.bin_2 | A331.M002 | 22  | 2.29 | 196.68 | 54.22 | 100.81 | 99.51  | 0.96 | Bacteroidetes      | Bacteroidetes              | Alistipes putredinis                           |
| Sample_A12_3.bin_2 | A123.M002 | 31  | 2.17 | 122.21 | 39.87 | 97.75  | 98.52  | 3.47 | Streptococcus      | Firmicutes                 | Streptococcus salivarius                       |
| Sample_A06_1.bin_2 | A061.M002 | 21  | 1.88 | 162.65 | 32.88 | 95.79  | 88.88  | 0.85 | Bacteria           | Candidatus Melainabacteria | Candidatus Gastranaerophilales bacterium HUM_2 |
| Sample_A04_2.bin_2 | A042.M002 | 107 | 2.76 | 41.13  | 41.90 | 95.77  | 96.86  | 0.00 | Clostridiales      | Firmicutes                 | uncultured Ruminococcus sp.                    |
| Sample_A32_3.bin_2 | A323.M002 | 50  | 1.28 | 47.04  | 25.74 | 94.76  | 93.25  | 2.81 | Bacteria           | Firmicutes                 | Clostridium sp. CAG:914                        |
| Sample_B23_3.bin_2 | B233.M002 | 23  | 3.72 | 231.38 | 48.43 | 92.21  | 98.51  | 0.00 | Bacteroidales      | Bacteroidetes              | Paraprevotella clara CAG:116                   |
| Sample_B13_2.bin_2 | B132.M002 | 25  | 2.83 | 177.51 | 47.12 | 85.99  | 93.67  | 0.00 | Clostridiales      | Firmicutes                 | Clostridium sp. TM06-18                        |
| Sample_A19_1.bin_2 | A191.M002 | 8   | 1.53 | 211.71 | 47.36 | 85.89  | 92.40  | 0.70 | Clostridiales      | Firmicutes                 | Clostridiales bacterium                        |
| Sample_A05_2.bin_2 | A052.M002 | 62  | 2.34 | 56.86  | 57.11 | 85.86  | 89.70  | 0.00 | Clostridiales      | Firmicutes                 | Firmicutes bacterium CAG:110                   |
| Sample_A17_3.bin_2 | A173.M002 | 66  | 2.44 | 59.77  | 30.10 | 85.77  | 95.28  | 0.00 | Bacteria           | Firmicutes                 | Coprobacillus sp. 8_1_38FAA                    |
| Sample_A31_3.bin_2 | A313.M002 | 50  | 2.25 | 69.94  | 31.52 | 83.45  | 100.00 | 0.63 | Firmicutes         | Firmicutes                 | Megamonas funiformis                           |

|                    |           |    |      |        |       |       |        |      |                    |                |                                  |
|--------------------|-----------|----|------|--------|-------|-------|--------|------|--------------------|----------------|----------------------------------|
| Sample_A02_3.bin_2 | A023.M002 | 41 | 2.16 | 86.57  | 59.88 | 82.82 | 98.38  | 1.34 | Actinobacteria     | Actinobacteria | Collinsella aerofaciens          |
| Sample_B03_2.bin_2 | B032.M002 | 71 | 3.00 | 57.58  | 43.30 | 82.19 | 91.31  | 1.29 | Clostridiales      | Firmicutes     | uncultured Blautia sp.           |
| Sample_B20_3.bin_2 | B203.M002 | 22 | 2.41 | 163.01 | 44.43 | 81.73 | 100.00 | 0.00 | Clostridiales      | Firmicutes     | Clostridium sp. CAG:632          |
| Sample_B12_2.bin_2 | B122.M002 | 40 | 2.32 | 81.19  | 40.89 | 80.50 | 96.00  | 0.00 | Lachnospiraceae    | Firmicutes     | Ruminococcus torques             |
| Sample_A29_3.bin_2 | A293.M002 | 82 | 3.42 | 68.52  | 59.26 | 80.47 | 98.65  | 1.51 | Clostridiales      | Firmicutes     | Ruminococcaceae bacterium        |
| Sample_A07_2.bin_2 | A072.M002 | 57 | 2.99 | 72.45  | 44.82 | 79.54 | 97.83  | 0.95 | Clostridiales      | Firmicutes     | Blautia sp. OM07-19              |
| Sample_A27_2.bin_2 | A272.M002 | 17 | 1.75 | 157.00 | 49.91 | 79.24 | 94.63  | 0.00 | Clostridiales      | Firmicutes     | Ruminococcaceae bacterium        |
| Sample_B20_1.bin_2 | B201.M002 | 16 | 1.27 | 160.62 | 28.20 | 78.91 | 80.02  | 0.22 | Clostridiales      | Firmicutes     | Clostridium sp. CAG:452          |
| Sample_A01_3.bin_2 | A013.M002 | 69 | 3.16 | 65.92  | 47.01 | 78.65 | 97.42  | 1.01 | Lachnospiraceae    | Firmicutes     | uncultured Clostridium sp.       |
| Sample_A02_1.bin_2 | A021.M002 | 71 | 2.33 | 50.95  | 38.33 | 78.56 | 98.75  | 0.00 | Lactobacillales    | Firmicutes     | Enterococcus faecium             |
| Sample_A09_1.bin_2 | A091.M002 | 33 | 2.50 | 135.91 | 49.97 | 77.74 | 98.30  | 0.00 | Bacteroidales      | Bacteroidetes  | Porphyromonadaceae bacterium     |
| Sample_B22_2.bin_2 | B222.M002 | 10 | 1.85 | 311.24 | 53.85 | 77.40 | 97.31  | 0.00 | Clostridiales      | Firmicutes     | Clostridiales bacterium          |
| Sample_B21_2.bin_3 | B212.M003 | 13 | 2.11 | 453.31 | 56.25 | 76.35 | 100.00 | 0.23 | Bifidobacteriaceae | Actinobacteria | Bifidobacterium pseudocatenuatum |
| Sample_B15_3.bin_3 | B153.M003 | 36 | 5.90 | 224.78 | 55.01 | 75.64 | 98.80  | 0.51 | Enterobacteriaceae | Proteobacteria | Klebsiella oxytoca               |
| Sample_B20_2.bin_3 | B202.M003 | 91 | 1.99 | 30.36  | 60.86 | 74.18 | 85.96  | 3.74 | Clostridiales      | Firmicutes     | Faecalibacterium prausnitzii     |

|                    |           |     |      |        |       |       |        |      |                    |                |                              |
|--------------------|-----------|-----|------|--------|-------|-------|--------|------|--------------------|----------------|------------------------------|
| Sample_A18_2.bin_3 | A182.M003 | 85  | 1.84 | 26.70  | 48.84 | 73.00 | 92.40  | 0.00 | Firmicutes         | Firmicutes     | Dialister sp. CAG:357        |
| Sample_B14_2.bin_3 | B142.M003 | 54  | 2.13 | 56.91  | 52.42 | 71.91 | 95.74  | 1.01 | Clostridiales      | Firmicutes     | Clostridiales bacterium      |
| Sample_A07_3.bin_3 | A073.M003 | 96  | 2.91 | 42.14  | 49.54 | 70.42 | 96.34  | 0.00 | Bacteroidales      | Bacteroidetes  | Prevotella sp. CAG:5226      |
| Sample_A32_3.bin_3 | A323.M003 | 42  | 4.75 | 176.42 | 41.43 | 70.36 | 98.12  | 1.21 | Bacteroidales      | Bacteroidetes  | Bacteroides dorei            |
| Sample_A09_2.bin_3 | A092.M003 | 29  | 2.13 | 110.08 | 44.69 | 70.17 | 98.46  | 0.61 | Lactobacillales    | Firmicutes     | Weissella confusa            |
| Sample_A24_3.bin_3 | A243.M003 | 21  | 3.12 | 340.20 | 58.78 | 70.09 | 99.27  | 0.48 | Bacteroidetes      | Bacteroidetes  | Alistipes onderdonkii        |
| Sample_B06_1.bin_3 | B061.M003 | 53  | 2.16 | 61.29  | 60.07 | 68.45 | 100.00 | 0.81 | Actinobacteria     | Actinobacteria | Collinsella aerofaciens      |
| Sample_B21_1.bin_3 | B211.M003 | 39  | 4.72 | 145.91 | 54.74 | 67.69 | 96.79  | 4.97 | Enterobacteriaceae | Proteobacteria | Enterobacter sp. Z1          |
| Sample_A23_3.bin_3 | A233.M003 | 107 | 2.42 | 37.22  | 50.83 | 67.07 | 96.64  | 0.00 | Clostridiales      | Firmicutes     | Ruminococcus sp. OM06-36AC   |
| Sample_A31_3.bin_3 | A313.M003 | 35  | 2.46 | 122.02 | 58.23 | 66.51 | 97.95  | 0.00 | Clostridiales      | Firmicutes     | Faecalibacterium prausnitzii |
| Sample_A17_1.bin_3 | A171.M003 | 62  | 2.02 | 44.82  | 42.19 | 66.13 | 95.63  | 3.69 | Streptococcus      | Firmicutes     | Streptococcus parasanguinis  |
| Sample_A29_2.bin_3 | A292.M003 | 30  | 1.81 | 83.86  | 57.22 | 65.75 | 88.33  | 1.17 | Clostridiales      | Firmicutes     | Oscillibacter sp.            |
| Sample_A07_1.bin_3 | A071.M003 | 60  | 4.41 | 117.26 | 52.03 | 65.29 | 94.76  | 0.14 | Enterobacteriaceae | Proteobacteria | Citrobacter freundii         |
| Sample_A32_2.bin_3 | A322.M003 | 29  | 2.03 | 88.28  | 39.51 | 64.83 | 97.98  | 0.34 | Clostridiales      | Firmicutes     | Eubacterium sp. OM08-24      |
| Sample_A29_1.bin_3 | A291.M003 | 29  | 2.43 | 176.63 | 32.55 | 64.39 | 97.27  | 0.67 | Clostridiales      | Firmicutes     | Eubacterium sp. CAG:156      |

|                    |           |     |      |         |       |       |        |      |                 |                 |                              |
|--------------------|-----------|-----|------|---------|-------|-------|--------|------|-----------------|-----------------|------------------------------|
| Sample_A05_2.bin_3 | A052.M003 | 13  | 2.14 | 1112.88 | 40.54 | 64.34 | 99.32  | 0.67 | Clostridiales   | Firmicutes      | Ruminococcus bromii          |
| Sample_A01_3.bin_3 | A013.M003 | 72  | 2.98 | 54.72   | 41.72 | 64.01 | 96.13  | 0.00 | Lachnospiraceae | Firmicutes      | Roseburia inulinivorans      |
| Sample_A23_2.bin_3 | A232.M003 | 27  | 2.24 | 172.91  | 59.95 | 61.83 | 100.00 | 0.81 | Actinobacteria  | Actinobacteria  | Collinsella aerofaciens      |
| Sample_A04_3.bin_3 | A043.M003 | 52  | 5.27 | 140.54  | 48.97 | 61.68 | 90.50  | 0.06 | Clostridiales   | Firmicutes      | Hungatella hathewayi         |
| Sample_B02_1.bin_3 | B021.M003 | 27  | 2.72 | 196.53  | 37.64 | 61.62 | 99.53  | 0.00 | Lactobacillales | Firmicutes      | Enterococcus faecalis        |
| Sample_A31_2.bin_3 | A312.M003 | 65  | 2.18 | 50.43   | 59.28 | 61.23 | 93.62  | 0.67 | Clostridiales   | Firmicutes      | Oscillibacter sp.            |
| Sample_B24_1.bin_3 | B241.M003 | 42  | 1.91 | 60.11   | 61.58 | 60.56 | 89.26  | 1.13 | Clostridiales   | Firmicutes      | Oscillibacter sp.            |
| Sample_A18_3.bin_3 | A183.M003 | 19  | 2.96 | 226.39  | 58.18 | 59.51 | 97.95  | 0.00 | Bacteria        | Verrucomicrobia | Akkermansia muciniphila      |
| Sample_A18_3.bin_4 | A183.M004 | 48  | 2.20 | 93.41   | 59.92 | 59.00 | 100.00 | 0.81 | Actinobacteria  | Actinobacteria  | Collinsella aerofaciens      |
| Sample_A06_1.bin_4 | A061.M004 | 32  | 1.63 | 63.01   | 60.44 | 58.89 | 86.93  | 0.00 | Clostridiales   | Firmicutes      | Firmicutes bacterium CAG:176 |
| Sample_A21_2.bin_4 | A212.M004 | 19  | 2.73 | 305.61  | 55.32 | 57.52 | 97.95  | 0.00 | Bacteria        | Verrucomicrobia | Akkermansia muciniphila      |
| Sample_A33_3.bin_4 | A333.M004 | 103 | 1.86 | 23.42   | 35.24 | 57.40 | 86.63  | 1.39 | Lactobacillales | Firmicutes      | Lactococcus lactis           |
| Sample_A28_2.bin_4 | A282.M004 | 22  | 2.30 | 157.39  | 52.76 | 54.64 | 97.04  | 0.00 | Clostridiales   | Firmicutes      | Clostridium sp. CAG:413      |
| Sample_B02_2.bin_4 | B022.M004 | 189 | 2.49 | 18.54   | 56.33 | 53.83 | 95.46  | 0.00 | Clostridiales   | Firmicutes      | Ruminococcaceae bacterium    |
| Sample_A36_1.bin_4 | A361.M004 | 14  | 2.29 | 184.58  | 41.92 | 53.69 | 96.64  | 0.00 | Clostridiales   | Firmicutes      | Butyrivibrio sp. CAG:318     |

|                    |           |    |      |        |       |       |        |      |                    |                |                              |
|--------------------|-----------|----|------|--------|-------|-------|--------|------|--------------------|----------------|------------------------------|
| Sample_B22_1.bin_4 | B221.M004 | 41 | 2.44 | 78.26  | 41.85 | 52.76 | 93.56  | 0.00 | Lachnospiraceae    | Firmicutes     | Dorea longicatena            |
| Sample_A04_1.bin_4 | A041.M004 | 45 | 1.96 | 77.11  | 56.90 | 52.67 | 85.68  | 0.00 | Clostridiales      | Firmicutes     | Ruminococcaceae bacterium    |
| Sample_B03_1.bin_4 | B031.M004 | 18 | 1.28 | 183.01 | 26.74 | 52.51 | 90.16  | 1.12 | Bacteria           | Firmicutes     | Firmicutes bacterium         |
| Sample_A06_3.bin_4 | A063.M004 | 20 | 1.91 | 165.68 | 60.48 | 51.75 | 100.00 | 0.00 | Bifidobacteriaceae | Actinobacteria | Bifidobacterium animalis     |
| Sample_B17_3.bin_4 | B173.M004 | 15 | 1.95 | 269.77 | 38.01 | 50.52 | 98.65  | 0.00 | Clostridiales      | Firmicutes     | Eubacterium sp. CAG:251      |
| Sample_B21_1.bin_4 | B211.M004 | 32 | 2.80 | 148.50 | 59.67 | 50.39 | 100.00 | 0.00 | Bacteroidetes      | Bacteroidetes  | Alistipes shahii             |
| Sample_B13_2.bin_4 | B132.M004 | 40 | 2.57 | 94.29  | 41.98 | 49.14 | 86.71  | 0.12 | Lachnospiraceae    | Firmicutes     | Roseburia sp. OF03-24        |
| Sample_B12_1.bin_4 | B121.M004 | 35 | 2.23 | 107.05 | 59.77 | 48.99 | 100.00 | 0.81 | Actinobacteria     | Actinobacteria | Collinsella aerofaciens      |
| Sample_A23_2.bin_4 | A232.M004 | 18 | 2.66 | 225.22 | 45.08 | 47.77 | 98.65  | 1.34 | Clostridiales      | Firmicutes     | Clostridium sp. CAG:242      |
| Sample_B02_3.bin_4 | B023.M004 | 20 | 2.66 | 219.64 | 41.26 | 47.52 | 97.98  | 0.00 | Clostridiales      | Firmicutes     | Clostridium sp. AF15-41      |
| Sample_B16_3.bin_4 | B163.M004 | 28 | 2.34 | 159.00 | 50.31 | 47.22 | 97.31  | 0.00 | Clostridiales      | Firmicutes     | Ruminococcus sp. CAG:579     |
| Sample_A28_1.bin_4 | A281.M004 | 9  | 1.94 | 236.90 | 36.31 | 46.67 | 98.65  | 0.00 | Clostridiales      | Firmicutes     | Firmicutes bacterium CAG:341 |
| Sample_A18_1.bin_4 | A181.M004 | 38 | 5.28 | 308.61 | 50.31 | 46.55 | 96.26  | 0.95 | Clostridiales      | Firmicutes     | Hungatella hathewayi         |
| Sample_A03_2.bin_4 | A032.M004 | 23 | 1.99 | 116.70 | 49.66 | 46.53 | 93.93  | 1.34 | Clostridiales      | Firmicutes     | Clostridiales bacterium      |
| Sample_A27_2.bin_4 | A272.M004 | 92 | 2.18 | 43.71  | 51.19 | 45.98 | 100.00 | 0.63 | Firmicutes         | Firmicutes     | Dialister succinatiphilus    |

|                    |           |    |      |        |       |       |        |      |                    |                |                                     |
|--------------------|-----------|----|------|--------|-------|-------|--------|------|--------------------|----------------|-------------------------------------|
| Sample_A23_3.bin_5 | A233.M005 | 24 | 2.57 | 148.90 | 38.86 | 45.07 | 99.36  | 0.00 | Clostridiales      | Firmicutes     | Lachnospiraceae bacterium AM25-39   |
| Sample_A09_2.bin_5 | A092.M005 | 54 | 1.81 | 45.44  | 60.74 | 44.70 | 85.27  | 3.74 | Clostridiales      | Firmicutes     | Faecalibacterium prausnitzii        |
| Sample_B11_3.bin_5 | B113.M005 | 27 | 2.43 | 134.37 | 46.84 | 44.38 | 100.00 | 0.90 | Selenomonadales    | Firmicutes     | Phascolarctobacterium succinatutens |
| Sample_B15_3.bin_5 | B153.M005 | 9  | 2.24 | 455.73 | 60.03 | 44.36 | 100.00 | 0.12 | Bifidobacteriaceae | Actinobacteria | Bifidobacterium longum              |
| Sample_A36_1.bin_5 | A361.M005 | 8  | 1.85 | 430.84 | 32.16 | 44.01 | 88.88  | 0.85 | Bacteria           | Cyanobacteria  | Cyanobacteria bacterium UBA10660    |
| Sample_A27_2.bin_5 | A272.M005 | 36 | 1.76 | 84.32  | 38.77 | 43.04 | 95.62  | 0.00 | Streptococcus      | Firmicutes     | Streptococcus anginosus             |
| Sample_B12_2.bin_5 | B122.M005 | 68 | 7.38 | 150.92 | 46.70 | 42.98 | 95.97  | 3.16 | Lachnospiraceae    | Firmicutes     | Eisenbergiella tayi                 |
| Sample_B22_2.bin_5 | B222.M005 | 32 | 2.47 | 114.59 | 48.75 | 42.86 | 100.00 | 0.11 | Proteobacteria     | Proteobacteria | Burkholderiales bacterium           |
| Sample_A07_3.bin_5 | A073.M005 | 44 | 2.70 | 91.52  | 44.10 | 42.30 | 95.54  | 1.90 | Clostridiales      | Firmicutes     | Ruminococcus sp. AF46-10NS          |
| Sample_B11_2.bin_5 | B112.M005 | 22 | 2.35 | 199.71 | 41.87 | 42.12 | 99.32  | 0.00 | Clostridiales      | Firmicutes     | Coprococcus sp. OM04-5BH            |
| Sample_A23_1.bin_5 | A231.M005 | 25 | 2.02 | 128.73 | 60.09 | 42.08 | 92.61  | 0.67 | Clostridiales      | Firmicutes     | Firmicutes bacterium CAG:83         |
| Sample_A04_3.bin_5 | A043.M005 | 73 | 2.13 | 37.57  | 33.62 | 41.29 | 97.30  | 0.71 | Bacteria           | Firmicutes     | Holdemanella biformis               |
| Sample_A02_3.bin_5 | A023.M005 | 21 | 2.30 | 145.02 | 44.35 | 41.07 | 97.09  | 0.00 | Clostridiales      | Firmicutes     | Ruminococcus sp. CAG:563            |
| Sample_A18_1.bin_5 | A181.M005 | 42 | 1.59 | 51.67  | 37.59 | 40.90 | 94.33  | 1.69 | Lactobacillales    | Firmicutes     | Streptococcus gallolyticus          |
| Sample_A06_1.bin_5 | A061.M005 | 32 | 2.68 | 118.35 | 44.98 | 40.48 | 93.67  | 0.34 | Clostridiales      | Firmicutes     | Ruminococcus sp. AF20-12LB          |



|                    |           |    |      |        |       |       |        |      |                    |                |                              |
|--------------------|-----------|----|------|--------|-------|-------|--------|------|--------------------|----------------|------------------------------|
| Sample_A19_1.bin_5 | A191.M005 | 70 | 2.03 | 34.68  | 58.91 | 40.25 | 90.67  | 3.23 | Clostridiales      | Firmicutes     | Faecalibacterium prausnitzii |
| Sample_B24_3.bin_5 | B243.M005 | 21 | 1.62 | 85.09  | 43.54 | 40.19 | 99.43  | 0.07 | Leuconostocaceae   | Firmicutes     | Leuconostoc lactis           |
| Sample_A22_1.bin_5 | A221.M005 | 25 | 1.01 | 72.44  | 26.13 | 39.80 | 84.83  | 1.69 | Bacteria           | Firmicutes     | Clostridium sp. CAG:628      |
| Sample_A30_2.bin_5 | A302.M005 | 45 | 2.21 | 86.44  | 53.07 | 39.55 | 98.38  | 0.81 | Clostridia         | Firmicutes     | Clostridium sp. CAG:226      |
| Sample_A09_1.bin_6 | A091.M006 | 49 | 2.65 | 73.30  | 56.15 | 39.36 | 89.03  | 0.67 | Clostridiales      | Firmicutes     | Firmicutes bacterium CAG:124 |
| Sample_B17_2.bin_6 | B172.M006 | 42 | 4.01 | 133.01 | 52.30 | 39.12 | 85.26  | 1.73 | Enterobacteriaceae | Proteobacteria | Citrobacter portucalensis    |
| Sample_A31_2.bin_6 | A312.M006 | 11 | 3.29 | 494.09 | 43.65 | 39.11 | 99.62  | 0.00 | Bacteroidales      | Bacteroidetes  | Bacteroides sp. CAG:20       |
| Sample_B20_2.bin_6 | B202.M006 | 81 | 2.24 | 54.95  | 59.95 | 39.03 | 100.00 | 2.42 | Actinobacteria     | Actinobacteria | Collinsella aerofaciens      |
| Sample_B13_1.bin_6 | B131.M006 | 17 | 2.20 | 214.97 | 45.47 | 39.01 | 97.87  | 0.71 | Clostridiales      | Firmicutes     | Firmicutes bacterium CAG:145 |
| Sample_B13_2.bin_6 | B132.M006 | 31 | 2.54 | 153.48 | 37.55 | 38.94 | 98.25  | 3.67 | Clostridiales      | Firmicutes     | Eubacterium sp.              |
| Sample_A29_2.bin_6 | A292.M006 | 39 | 3.11 | 129.03 | 62.21 | 38.75 | 92.75  | 0.13 | Clostridiales      | Firmicutes     | Flavonifractor plautii       |
| Sample_B12_2.bin_6 | B122.M006 | 27 | 2.24 | 147.51 | 59.86 | 38.57 | 100.00 | 0.81 | Actinobacteria     | Actinobacteria | Collinsella aerofaciens      |
| Sample_A36_3.bin_6 | A363.M006 | 11 | 1.60 | 295.31 | 48.64 | 38.33 | 93.95  | 0.81 | Clostridia         | Firmicutes     | Subdoligranulum sp. CAG:314  |
| Sample_B05_2.bin_6 | B052.M006 | 70 | 2.84 | 48.18  | 41.69 | 38.28 | 90.92  | 0.00 | Clostridiales      | Firmicutes     | Blautia obeum                |
| Sample_A33_3.bin_6 | A333.M006 | 17 | 2.59 | 226.38 | 35.91 | 37.69 | 97.98  | 0.00 | Clostridiales      | Firmicutes     | Eubacterium sp. CAG:76       |

|                    |           |    |      |        |       |       |       |      |                    |                |                                 |
|--------------------|-----------|----|------|--------|-------|-------|-------|------|--------------------|----------------|---------------------------------|
| Sample_A09_3.bin_6 | A093.M006 | 57 | 2.77 | 66.00  | 46.87 | 37.46 | 92.75 | 1.87 | Lachnospiraceae    | Firmicutes     | Lachnospiraceae bacterium       |
| Sample_A01_2.bin_6 | A012.M006 | 38 | 2.55 | 136.35 | 45.06 | 37.24 | 98.99 | 0.00 | Clostridiales      | Firmicutes     | Eubacterium siraeum             |
| Sample_B22_3.bin_6 | B223.M006 | 35 | 2.84 | 127.03 | 48.29 | 37.24 | 97.67 | 0.63 | Clostridiales      | Firmicutes     | Fusicatenibacter saccharivorans |
| Sample_A21_3.bin_6 | A213.M006 | 64 | 2.71 | 52.82  | 46.32 | 37.15 | 90.29 | 0.06 | Bacteroidales      | Bacteroidetes  | Bacteroides coprophilus CAG:333 |
| Sample_B20_1.bin_6 | B201.M006 | 22 | 4.69 | 337.29 | 56.05 | 36.89 | 99.37 | 0.04 | Enterobacteriaceae | Proteobacteria | Enterobacter bugandensis        |
| Sample_B11_2.bin_6 | B112.M006 | 29 | 2.81 | 148.12 | 51.72 | 36.68 | 92.61 | 1.34 | Clostridiales      | Firmicutes     | Ruminococcaceae bacterium       |
| Sample_B21_3.bin_6 | B213.M006 | 54 | 1.27 | 50.88  | 34.63 | 36.41 | 99.37 | 0.63 | Lactobacillales    | Firmicutes     | Lactobacillus sanfranciscensis  |
| Sample_A33_1.bin_6 | A331.M006 | 38 | 2.52 | 109.83 | 41.50 | 36.10 | 98.42 | 0.00 | Lachnospiraceae    | Firmicutes     | Dorea longicatena               |
| Sample_B13_2.bin_7 | B132.M007 | 44 | 1.67 | 58.54  | 53.62 | 36.09 | 96.62 | 0.19 | Bacteria           | Elusimicrobia  | Elusimicrobium sp. An273        |
| Sample_A30_3.bin_7 | A303.M007 | 52 | 3.15 | 82.43  | 44.77 | 35.90 | 93.80 | 0.00 | Bacteroidales      | Bacteroidetes  | Bacteroides plebeius            |
| Sample_B12_2.bin_7 | B122.M007 | 13 | 1.86 | 246.11 | 44.59 | 35.81 | 97.98 | 0.34 | Clostridiales      | Firmicutes     | Eubacterium sp. CAG:180         |
| Sample_A18_1.bin_7 | A181.M007 | 17 | 2.71 | 225.13 | 44.17 | 35.67 | 98.65 | 0.00 | Clostridiales      | Firmicutes     | Lachnospiraceae bacterium       |
| Sample_A17_3.bin_7 | A173.M007 | 35 | 2.81 | 105.06 | 52.81 | 35.26 | 98.73 | 0.00 | Clostridiales      | Firmicutes     | Clostridium sp. CAG:58          |
| Sample_A02_3.bin_7 | A023.M007 | 64 | 3.35 | 80.16  | 53.84 | 34.95 | 91.14 | 0.00 | Bacteroidales      | Bacteroidetes  | Bacteroides sp. CAG:462         |
| Sample_A27_3.bin_7 | A273.M007 | 81 | 2.10 | 42.46  | 53.89 | 34.89 | 86.24 | 0.67 | Clostridiales      | Firmicutes     | Ruminococcus sp. CAG:330        |

|                    |           |    |      |        |       |       |        |      |                 |               |                                            |
|--------------------|-----------|----|------|--------|-------|-------|--------|------|-----------------|---------------|--------------------------------------------|
| Sample_B05_2.bin_7 | B052.M007 | 47 | 1.33 | 44.25  | 26.91 | 34.33 | 93.82  | 0.00 | Bacteria        | Firmicutes    | Clostridium sp. CAG:710                    |
| Sample_B15_3.bin_7 | B153.M007 | 61 | 2.35 | 54.83  | 44.79 | 34.01 | 98.18  | 0.63 | Clostridiales   | Firmicutes    | uncultured Ruminococcus sp.                |
| Sample_B11_2.bin_7 | B112.M007 | 22 | 2.12 | 136.47 | 37.49 | 33.28 | 99.32  | 0.00 | Clostridiales   | Firmicutes    | Butyrivibrio sp.                           |
| Sample_B14_3.bin_7 | B143.M007 | 6  | 1.94 | 358.82 | 30.48 | 32.72 | 88.88  | 0.85 | Bacteria        | Firmicutes    | Clostridium sp. CAG:768                    |
| Sample_A32_2.bin_7 | A322.M007 | 32 | 2.08 | 84.05  | 47.56 | 32.70 | 97.98  | 0.00 | Clostridiales   | Firmicutes    | Anaerotignum faecicola                     |
| Sample_B16_3.bin_7 | B163.M007 | 46 | 2.24 | 62.57  | 54.15 | 32.58 | 100.00 | 0.00 | Selenomonadales | Firmicutes    | Megasphaera sp. NM10                       |
| Sample_A06_2.bin_7 | A062.M007 | 75 | 2.47 | 63.68  | 46.40 | 32.22 | 94.63  | 1.34 | Clostridiales   | Firmicutes    | Ruminococcaceae bacterium                  |
| Sample_A04_2.bin_7 | A042.M007 | 52 | 3.24 | 83.90  | 30.94 | 31.69 | 97.16  | 0.00 | Bacteria        | Firmicutes    | Coprobacillus cateniformis                 |
| Sample_A24_3.bin_7 | A243.M007 | 77 | 2.95 | 73.93  | 29.25 | 31.44 | 100.00 | 2.25 | Bacteria        | Fusobacteriia | Fusobacterium varium                       |
| Sample_A03_1.bin_7 | A031.M007 | 42 | 3.54 | 119.02 | 37.92 | 31.36 | 92.61  | 2.01 | Clostridiales   | Firmicutes    | Lachnospiraceae bacterium                  |
| Sample_B24_1.bin_7 | B241.M007 | 30 | 2.77 | 144.32 | 43.05 | 31.34 | 99.41  | 0.00 | Lachnospiraceae | Firmicutes    | Ruminococcus gnavus                        |
| Sample_A27_1.bin_7 | A271.M007 | 59 | 2.42 | 51.33  | 43.33 | 31.13 | 87.34  | 0.42 | Clostridiales   | Firmicutes    | Ruminococcus sp. AF41-9                    |
| Sample_A03_2.bin_7 | A032.M007 | 44 | 2.02 | 62.79  | 55.52 | 31.07 | 81.69  | 0.38 | Bacteroidales   | Bacteroidetes | Muribaculaceae bacterium Isolate-013 (NCI) |
| Sample_B16_2.bin_7 | B162.M007 | 78 | 2.12 | 39.85  | 34.19 | 30.77 | 93.66  | 0.37 | Bacteria        | Firmicutes    | Eubacterium sp. AM28-29                    |
| Sample_A24_1.bin_7 | A241.M007 | 79 | 2.67 | 49.09  | 47.92 | 30.10 | 95.28  | 0.13 | Bacteroidales   | Bacteroidetes | Porphyromonadaceae bacterium               |

|                    |           |    |      |        |       |       |        |      |                 |               |                              |
|--------------------|-----------|----|------|--------|-------|-------|--------|------|-----------------|---------------|------------------------------|
| Sample_B02_2.bin_8 | B022.M008 | 46 | 6.31 | 163.97 | 43.54 | 30.02 | 98.46  | 0.77 | Bacteroidales   | Bacteroidetes | Parabacteroides goldsteinii  |
| Sample_A18_2.bin_8 | A182.M008 | 27 | 2.71 | 120.47 | 43.76 | 29.87 | 94.92  | 0.48 | Lachnospiraceae | Firmicutes    | Roseburia faecis             |
| Sample_B21_1.bin_8 | B211.M008 | 71 | 2.16 | 64.61  | 48.50 | 29.77 | 95.96  | 0.81 | Clostridia      | Firmicutes    | Clostridia bacterium         |
| Sample_A33_1.bin_8 | A331.M008 | 49 | 2.54 | 94.95  | 41.36 | 29.74 | 98.83  | 0.00 | Lachnospiraceae | Firmicutes    | uncultured Ruminococcus sp.  |
| Sample_B16_3.bin_8 | B163.M008 | 91 | 3.00 | 50.10  | 58.22 | 29.62 | 100.00 | 1.01 | Clostridia      | Firmicutes    | Clostridiales bacterium      |
| Sample_A36_2.bin_8 | A362.M008 | 37 | 2.68 | 105.98 | 44.09 | 29.34 | 95.65  | 1.93 | Lachnospiraceae | Firmicutes    | Lachnospiraceae bacterium    |
| Sample_B17_1.bin_8 | B171.M008 | 57 | 1.98 | 43.66  | 43.28 | 29.24 | 87.15  | 0.00 | Lachnospiraceae | Firmicutes    | Ruminococcus lactaris        |
| Sample_A28_2.bin_8 | A282.M008 | 32 | 1.17 | 54.71  | 26.72 | 28.99 | 90.16  | 1.69 | Bacteria        | Firmicutes    | Firmicutes bacterium CAG:321 |
| Sample_A30_2.bin_8 | A302.M008 | 20 | 3.87 | 336.81 | 43.46 | 28.54 | 82.25  | 0.00 | Bacteroidales   | Bacteroidetes | Bacteroides fragilis         |
| Sample_A29_2.bin_8 | A292.M008 | 44 | 2.97 | 103.40 | 45.22 | 28.45 | 86.94  | 0.95 | Clostridiales   | Firmicutes    | uncultured Blautia sp.       |
| Sample_B15_2.bin_8 | B152.M008 | 23 | 2.18 | 151.87 | 36.17 | 28.34 | 96.42  | 0.00 | Lactobacillus   | Firmicutes    | Lactobacillus crispatus      |
| Sample_A28_3.bin_8 | A283.M008 | 21 | 2.20 | 156.67 | 37.11 | 28.33 | 99.32  | 0.34 | Clostridiales   | Firmicutes    | uncultured Ruminococcus sp.  |
| Sample_A21_1.bin_8 | A211.M008 | 21 | 2.96 | 297.89 | 43.77 | 28.05 | 99.32  | 0.00 | Clostridiales   | Firmicutes    | Coprococcus sp. BIOML-A1     |
| Sample_B14_3.bin_8 | B143.M008 | 64 | 3.05 | 65.57  | 29.01 | 27.96 | 99.05  | 0.00 | Bacteria        | Firmicutes    | uncultured Clostridium sp.   |
| Sample_A06_1.bin_8 | A061.M008 | 32 | 2.50 | 113.71 | 33.18 | 27.67 | 99.32  | 0.00 | Clostridiales   | Firmicutes    | uncultured Eubacterium sp.   |

|                    |           |    |      |        |       |       |       |      |                 |                            |                                                 |
|--------------------|-----------|----|------|--------|-------|-------|-------|------|-----------------|----------------------------|-------------------------------------------------|
| Sample_A02_2.bin_8 | A022.M008 | 28 | 1.85 | 88.39  | 32.58 | 27.41 | 99.47 | 0.00 | Lactobacillales | Firmicutes                 | Lactobacillus salivarius                        |
| Sample_B18_1.bin_9 | B181.M009 | 41 | 2.76 | 83.65  | 49.09 | 27.24 | 97.46 | 2.53 | Clostridiales   | Firmicutes                 | Lachnoclostridium sp.                           |
| Sample_A36_3.bin_9 | A363.M009 | 74 | 2.41 | 47.93  | 61.75 | 27.19 | 97.37 | 1.25 | Proteobacteria  | Proteobacteria             | Sutterella megalosphaeroides                    |
| Sample_B05_3.bin_9 | B053.M009 | 27 | 2.12 | 180.56 | 35.17 | 27.19 | 87.17 | 0.28 | Bacteria        | Candidatus Melainabacteria | Candidatus Gastranaerophilales bacterium HUM_10 |
| Sample_B15_2.bin_9 | B152.M009 | 98 | 3.20 | 54.90  | 56.12 | 26.96 | 98.38 | 1.61 | Clostridia      | Firmicutes                 | Clostridiales bacterium                         |
| Sample_A03_1.bin_9 | A031.M009 | 79 | 2.22 | 36.64  | 38.55 | 26.93 | 89.93 | 0.67 | Clostridiales   | Firmicutes                 | uncultured Eubacterium sp.                      |
| Sample_A19_1.bin_9 | A191.M009 | 21 | 2.34 | 158.59 | 33.04 | 26.81 | 98.12 | 0.67 | Clostridiales   | Firmicutes                 | Eubacterium sp. CAG:274                         |
| Sample_A12_2.bin_9 | A122.M009 | 32 | 2.20 | 173.60 | 46.08 | 26.73 | 97.98 | 0.00 | Clostridiales   | Firmicutes                 | Ruminococcus sp.                                |
| Sample_A09_2.bin_9 | A092.M009 | 25 | 2.52 | 138.36 | 51.47 | 26.68 | 95.30 | 0.00 | Clostridiales   | Firmicutes                 | Ruminococcus sp. OM06-36AC                      |
| Sample_B23_3.bin_9 | B233.M009 | 33 | 2.06 | 84.56  | 58.84 | 26.31 | 97.98 | 0.00 | Clostridiales   | Firmicutes                 | Oscillibacter sp.                               |
| Sample_A30_1.bin_9 | A301.M009 | 48 | 1.75 | 66.81  | 38.91 | 26.04 | 98.58 | 0.15 | Streptococcus   | Firmicutes                 | Streptococcus thermophilus                      |
| Sample_B02_1.bin_9 | B021.M009 | 29 | 5.51 | 259.88 | 49.47 | 25.94 | 94.90 | 0.00 | Clostridiales   | Firmicutes                 | Enterocloster bolteae                           |
| Sample_A06_3.bin_9 | A063.M009 | 31 | 1.90 | 83.47  | 56.93 | 25.87 | 86.57 | 0.00 | Clostridiales   | Firmicutes                 | Clostridiales bacterium                         |
| Sample_A04_3.bin_9 | A043.M009 | 29 | 2.57 | 156.09 | 36.34 | 25.81 | 98.65 | 0.00 | Clostridiales   | Firmicutes                 | Eubacterium sp. CAG:86                          |
| Sample_B16_2.bin_9 | B162.M009 | 11 | 1.71 | 189.57 | 47.12 | 25.63 | 86.57 | 0.00 | Clostridiales   | Firmicutes                 | Ruminococcus sp. CAG:403                        |

|                     |           |     |      |        |       |       |        |      |                    |                |                                    |
|---------------------|-----------|-----|------|--------|-------|-------|--------|------|--------------------|----------------|------------------------------------|
| Sample_A29_3.bin_9  | A293.M009 | 19  | 1.72 | 164.09 | 45.16 | 25.61 | 92.17  | 0.67 | Clostridiales      | Firmicutes     | Eubacterium sp. CAG:841            |
| Sample_A21_2.bin_10 | A212.M010 | 39  | 2.65 | 97.88  | 42.37 | 25.51 | 91.27  | 0.00 | Clostridiales      | Firmicutes     | Roseburia sp. CAG:309              |
| Sample_B15_3.bin_10 | B153.M010 | 40  | 2.39 | 100.34 | 34.28 | 25.43 | 99.32  | 0.00 | Clostridiales      | Firmicutes     | Eubacterium ventriosum             |
| Sample_A18_3.bin_10 | A183.M010 | 29  | 2.05 | 98.27  | 57.81 | 25.40 | 96.64  | 0.00 | Clostridiales      | Firmicutes     | Oscillibacter sp. 57_20            |
| Sample_B03_3.bin_10 | B033.M010 | 16  | 1.98 | 227.64 | 45.28 | 25.37 | 99.40  | 1.20 | Selenomonadales    | Firmicutes     | Phascolarctobacterium sp. CAG:266  |
| Sample_A01_2.bin_10 | A012.M010 | 25  | 2.23 | 160.82 | 33.27 | 25.33 | 99.32  | 0.00 | Clostridiales      | Firmicutes     | Eubacterium sp. AF36-5BH           |
| Sample_A03_2.bin_10 | A032.M010 | 48  | 1.86 | 48.17  | 59.64 | 25.31 | 81.50  | 0.17 | Clostridiales      | Firmicutes     | Subdoligranulum sp. 60_17          |
| Sample_A09_1.bin_10 | A091.M010 | 34  | 2.10 | 122.40 | 48.47 | 25.25 | 81.71  | 0.54 | Rhodospirillales   | Proteobacteria | Alphaproteobacteria bacterium      |
| Sample_A23_3.bin_10 | A233.M010 | 45  | 2.24 | 83.24  | 60.72 | 25.16 | 94.55  | 0.00 | Clostridiales      | Firmicutes     | Subdoligranulum sp. 60_17          |
| Sample_B21_2.bin_10 | B212.M010 | 62  | 2.37 | 55.24  | 57.40 | 24.91 | 96.87  | 0.00 | Proteobacteria     | Proteobacteria | Mesosutterella multiformis         |
| Sample_A07_2.bin_10 | A072.M010 | 101 | 2.25 | 39.41  | 44.15 | 24.90 | 99.38  | 1.05 | Selenomonadales    | Firmicutes     | Phascolarctobacterium faecium      |
| Sample_A23_2.bin_10 | A232.M010 | 45  | 3.28 | 127.17 | 58.21 | 24.74 | 97.95  | 0.00 | Clostridiales      | Firmicutes     | Ruthenibacterium lactatiformans    |
| Sample_A18_2.bin_10 | A182.M010 | 32  | 1.95 | 115.82 | 59.54 | 24.69 | 100.00 | 0.81 | Actinobacteria     | Actinobacteria | Collinsella sp. WCA1-178-WT-3 (M2) |
| Sample_A33_1.bin_10 | A331.M010 | 114 | 4.70 | 65.02  | 55.76 | 24.65 | 98.09  | 4.63 | Enterobacteriaceae | Proteobacteria | Enterobacter cloacae               |
| Sample_B02_3.bin_10 | B023.M010 | 27  | 2.50 | 99.14  | 41.20 | 24.55 | 98.06  | 1.22 | Lachnospiraceae    | Firmicutes     | Roseburia sp. AF15-21              |

|                     |           |     |      |        |       |       |        |      |                 |                |                              |
|---------------------|-----------|-----|------|--------|-------|-------|--------|------|-----------------|----------------|------------------------------|
| Sample_B02_1.bin_10 | B021.M010 | 62  | 2.38 | 60.41  | 62.04 | 24.42 | 95.65  | 0.62 | Proteobacteria  | Proteobacteria | Sutterella megalosphaeroides |
| Sample_A03_1.bin_10 | A031.M010 | 37  | 1.01 | 34.97  | 24.69 | 24.25 | 91.57  | 2.41 | Bacteria        | Tenericutes    | Mycoplasma sp. CAG:611       |
| Sample_A27_2.bin_10 | A272.M010 | 107 | 2.72 | 34.62  | 41.83 | 24.03 | 91.83  | 1.34 | Lachnospiraceae | Firmicutes     | Lachnospiraceae bacterium    |
| Sample_A31_2.bin_10 | A312.M010 | 24  | 2.24 | 126.51 | 52.17 | 23.99 | 97.27  | 0.00 | Clostridiales   | Firmicutes     | Ruminococcaceae bacterium    |
| Sample_A19_2.bin_10 | A192.M010 | 18  | 2.53 | 249.13 | 41.33 | 23.85 | 99.32  | 0.00 | Clostridiales   | Firmicutes     | uncultured Coprococcus sp.   |
| Sample_A18_2.bin_11 | A182.M011 | 23  | 2.09 | 178.31 | 55.88 | 23.72 | 98.75  | 0.63 | Proteobacteria  | Proteobacteria | Sutterella sp. AM11-39       |
| Sample_A36_3.bin_11 | A363.M011 | 57  | 3.04 | 75.89  | 46.05 | 23.69 | 97.12  | 1.63 | Lachnospiraceae | Firmicutes     | Lachnospiraceae bacterium    |
| Sample_B22_2.bin_11 | B222.M011 | 43  | 2.84 | 93.91  | 49.17 | 23.67 | 99.36  | 0.00 | Clostridiales   | Firmicutes     | Clostridium sp. CAG:299      |
| Sample_B16_3.bin_11 | B163.M011 | 20  | 1.87 | 112.22 | 62.40 | 23.66 | 87.91  | 0.17 | Clostridiales   | Firmicutes     | Clostridiales bacterium      |
| Sample_B17_3.bin_11 | B173.M011 | 55  | 2.83 | 81.77  | 55.22 | 23.61 | 100.00 | 0.00 | Proteobacteria  | Proteobacteria | Sutterella wadsworthensis    |
| Sample_A31_2.bin_11 | A312.M011 | 62  | 3.43 | 74.21  | 41.02 | 23.51 | 97.46  | 2.22 | Clostridiales   | Firmicutes     | uncultured Lachnospira sp.   |
| Sample_A01_3.bin_11 | A013.M011 | 44  | 2.35 | 81.55  | 60.17 | 23.49 | 100.00 | 0.00 | Bacteria        | Synergistetes  | Pyramidobacter piscolens     |
| Sample_B15_2.bin_11 | B152.M011 | 34  | 1.82 | 72.88  | 38.75 | 23.47 | 90.16  | 1.09 | Lactobacillales | Firmicutes     | Lactobacillus reuteri        |
| Sample_B11_3.bin_11 | B113.M011 | 29  | 2.43 | 101.93 | 45.05 | 23.34 | 95.46  | 0.00 | Lachnospiraceae | Firmicutes     | Roseburia sp. CAG:197        |
| Sample_A29_1.bin_11 | A291.M011 | 50  | 2.41 | 74.96  | 41.88 | 23.25 | 96.42  | 0.67 | Clostridiales   | Firmicutes     | Clostridiales bacterium      |

|                     |           |    |      |        |       |       |        |      |                    |                |                               |
|---------------------|-----------|----|------|--------|-------|-------|--------|------|--------------------|----------------|-------------------------------|
| Sample_A22_1.bin_11 | A221.M011 | 49 | 2.50 | 72.17  | 42.27 | 23.22 | 98.65  | 0.00 | Clostridiales      | Firmicutes     | Clostridium sp. OM05-6BH      |
| Sample_A03_2.bin_11 | A032.M011 | 36 | 2.21 | 128.55 | 54.47 | 23.16 | 98.12  | 0.63 | Proteobacteria     | Proteobacteria | Sutterella sp. AM11-39        |
| Sample_A30_1.bin_12 | A301.M012 | 27 | 1.22 | 108.21 | 26.13 | 23.03 | 90.66  | 1.33 | Bacteria           | Firmicutes     | Firmicutes bacterium CAG:321  |
| Sample_B21_2.bin_12 | B212.M012 | 28 | 2.60 | 132.69 | 40.67 | 22.93 | 98.65  | 0.00 | Clostridiales      | Firmicutes     | Lachnospiraceae bacterium     |
| Sample_A23_2.bin_12 | A232.M012 | 14 | 2.04 | 214.26 | 40.69 | 22.87 | 99.32  | 0.00 | Clostridiales      | Firmicutes     | Ruminococcus bromii           |
| Sample_A27_2.bin_12 | A272.M012 | 13 | 2.05 | 181.00 | 59.58 | 22.83 | 99.54  | 0.00 | Bifidobacteriaceae | Actinobacteria | Bifidobacterium adolescentis  |
| Sample_B05_2.bin_12 | B052.M012 | 19 | 2.68 | 185.02 | 55.01 | 22.83 | 100.00 | 0.00 | Bacteroidetes      | Bacteroidetes  | Alistipes sp. AF17-16         |
| Sample_A02_3.bin_12 | A023.M012 | 22 | 2.46 | 149.02 | 42.32 | 22.72 | 95.30  | 0.00 | Clostridiales      | Firmicutes     | Bacteroides pectinophilus     |
| Sample_B17_3.bin_12 | B173.M012 | 54 | 2.23 | 62.99  | 60.93 | 22.58 | 89.26  | 1.34 | Clostridiales      | Firmicutes     | uncultured Flavonifractor sp. |
| Sample_A23_3.bin_12 | A233.M012 | 23 | 1.99 | 150.20 | 39.38 | 22.50 | 98.97  | 0.00 | Pasteurellaceae    | Proteobacteria | Haemophilus parainfluenzae    |
| Sample_B20_3.bin_12 | B203.M012 | 15 | 1.94 | 175.13 | 36.69 | 22.45 | 98.12  | 0.00 | Lactobacillales    | Firmicutes     | Streptococcus mutans          |
| Sample_B15_1.bin_12 | B151.M012 | 42 | 2.49 | 120.13 | 57.48 | 22.44 | 95.30  | 0.00 | Clostridiales      | Firmicutes     | Ruminococcaceae bacterium     |
| Sample_B05_3.bin_12 | B053.M012 | 41 | 2.57 | 85.57  | 38.58 | 22.44 | 91.54  | 0.00 | Lachnospiraceae    | Firmicutes     | Eubacterium rectale           |
| Sample_A31_2.bin_12 | A312.M012 | 64 | 2.12 | 61.92  | 33.74 | 22.35 | 98.65  | 0.34 | Clostridiales      | Firmicutes     | Eubacterium sp. CAG:581       |
| Sample_A29_1.bin_12 | A291.M012 | 59 | 2.51 | 86.61  | 54.89 | 22.22 | 98.65  | 0.67 | Clostridiales      | Firmicutes     | uncultured Butyricoccus sp.   |



|                     |           |    |      |        |       |       |        |      |                 |                |                             |
|---------------------|-----------|----|------|--------|-------|-------|--------|------|-----------------|----------------|-----------------------------|
| Sample_B18_2.bin_12 | B182.M012 | 69 | 4.82 | 106.19 | 45.08 | 22.19 | 99.42  | 0.00 | Bacteroidales   | Bacteroidetes  | Parabacteroides distasonis  |
| Sample_A09_2.bin_13 | A092.M013 | 35 | 2.20 | 103.86 | 59.90 | 22.19 | 100.00 | 0.81 | Actinobacteria  | Actinobacteria | Collinsella aerofaciens     |
| Sample_B14_3.bin_13 | B143.M013 | 52 | 2.19 | 63.16  | 60.34 | 22.11 | 88.30  | 0.27 | Clostridia      | Firmicutes     | Clostridiales bacterium     |
| Sample_A28_2.bin_13 | A282.M013 | 74 | 1.96 | 43.70  | 48.22 | 22.09 | 94.63  | 0.02 | Clostridiales   | Firmicutes     | Ruminococcaceae bacterium   |
| Sample_A24_2.bin_13 | A242.M013 | 37 | 2.97 | 122.70 | 49.41 | 22.08 | 95.17  | 0.37 | Bacteroidales   | Bacteroidetes  | Prevotella sp. AG:487_50_53 |
| Sample_A23_3.bin_13 | A233.M013 | 29 | 2.12 | 94.55  | 61.25 | 22.02 | 96.30  | 0.67 | Clostridiales   | Firmicutes     | Clostridiales bacterium     |
| Sample_B17_1.bin_13 | B171.M013 | 52 | 2.67 | 66.70  | 36.92 | 21.99 | 98.65  | 1.34 | Clostridiales   | Firmicutes     | Anaerostipes hadrus         |
| Sample_B18_1.bin_13 | B181.M013 | 53 | 1.74 | 40.74  | 57.44 | 21.96 | 84.91  | 0.00 | Clostridiales   | Firmicutes     | Clostridiales bacterium     |
| Sample_A18_2.bin_13 | A182.M013 | 38 | 1.92 | 75.76  | 33.47 | 21.93 | 97.09  | 0.00 | Bacilli         | Firmicutes     | Melissococcus sp. OM08-11BH |
| Sample_A27_2.bin_13 | A272.M013 | 10 | 1.76 | 186.44 | 53.98 | 21.86 | 100.00 | 0.12 | Actinobacteria  | Actinobacteria | Eggerthella sp. CAG:298     |
| Sample_B22_1.bin_13 | B221.M013 | 46 | 2.52 | 90.72  | 45.86 | 21.72 | 95.30  | 0.67 | Clostridiales   | Firmicutes     | Ruminococcaceae bacterium   |
| Sample_B22_2.bin_13 | B222.M013 | 10 | 2.01 | 229.73 | 38.57 | 21.69 | 98.20  | 0.00 | Selenomonadales | Firmicutes     | Veillonella parvula         |
| Sample_A19_2.bin_14 | A192.M014 | 91 | 2.43 | 43.12  | 52.33 | 21.63 | 100.00 | 0.00 | Firmicutes      | Firmicutes     | Dialister succinatiphilus   |
| Sample_B21_3.bin_14 | B213.M014 | 12 | 2.42 | 289.44 | 58.52 | 21.63 | 98.39  | 0.00 | Bacteroidetes   | Bacteroidetes  | Alistipes sp. AF17-16       |
| Sample_A02_1.bin_14 | A021.M014 | 21 | 2.30 | 174.23 | 56.30 | 21.53 | 94.63  | 0.67 | Clostridiales   | Firmicutes     | Ruminococcaceae bacterium   |

|                     |           |     |      |        |       |       |        |      |                     |                 |                              |
|---------------------|-----------|-----|------|--------|-------|-------|--------|------|---------------------|-----------------|------------------------------|
| Sample_B23_3.bin_14 | B233.M014 | 35  | 3.90 | 142.43 | 45.50 | 21.18 | 99.61  | 0.00 | Bacteroidales       | Bacteroidetes   | Parabacteroides merdae       |
| Sample_B20_3.bin_14 | B203.M014 | 30  | 2.16 | 159.43 | 59.73 | 20.93 | 100.00 | 0.81 | Actinobacteria      | Actinobacteria  | Collinsella aerofaciens      |
| Sample_A06_3.bin_14 | A063.M014 | 38  | 2.64 | 90.51  | 38.52 | 20.92 | 97.77  | 0.00 | Clostridiales       | Firmicutes      | Firmicutes bacterium AM10-47 |
| Sample_A22_1.bin_14 | A221.M014 | 56  | 2.80 | 65.01  | 46.75 | 20.89 | 96.13  | 1.93 | Lachnospiraceae     | Firmicutes      | uncultured Clostridium sp.   |
| Sample_A02_3.bin_14 | A023.M014 | 26  | 2.57 | 111.00 | 45.16 | 20.85 | 88.25  | 0.00 | Clostridiales       | Firmicutes      | Clostridium sp. OM07-9AC     |
| Sample_A28_3.bin_14 | A283.M014 | 62  | 2.74 | 66.24  | 38.24 | 20.67 | 97.98  | 1.01 | Clostridiales       | Firmicutes      | uncultured Clostridium sp.   |
| Sample_A23_3.bin_14 | A233.M014 | 42  | 2.73 | 87.50  | 57.37 | 20.66 | 97.76  | 2.68 | Clostridiales       | Firmicutes      | Firmicutes bacterium CAG:137 |
| Sample_A24_1.bin_14 | A241.M014 | 27  | 1.64 | 100.58 | 34.70 | 20.64 | 91.77  | 1.08 | Bacteria            | Firmicutes      | Faecalitalea cylindroides    |
| Sample_A30_2.bin_14 | A302.M014 | 51  | 3.17 | 82.69  | 42.93 | 20.52 | 93.71  | 0.12 | Lachnospiraceae     | Firmicutes      | Roseburia intestinalis       |
| Sample_A36_1.bin_14 | A361.M014 | 28  | 3.14 | 177.69 | 57.85 | 20.48 | 97.95  | 1.36 | Bacteria            | Verrucomicrobia | Akkermansia muciniphila      |
| Sample_B02_2.bin_15 | B022.M015 | 182 | 1.96 | 14.46  | 53.62 | 20.37 | 86.12  | 0.00 | Clostridiales       | Firmicutes      | Ruminococcaceae bacterium    |
| Sample_A33_2.bin_15 | A332.M015 | 9   | 2.68 | 360.40 | 55.03 | 20.25 | 100.00 | 0.00 | Bacteroidetes       | Bacteroidetes   | Alistipes indistinctus       |
| Sample_B22_2.bin_15 | B222.M015 | 53  | 1.13 | 28.47  | 24.37 | 20.11 | 84.83  | 4.09 | Bacteria            | Firmicutes      | Firmicutes bacterium         |
| Sample_A23_3.bin_15 | A233.M015 | 26  | 2.54 | 130.81 | 38.89 | 20.11 | 87.24  | 0.00 | Clostridiales       | Firmicutes      | Clostridium sp. CAG:230      |
| Sample_A32_2.bin_15 | A322.M015 | 29  | 2.50 | 146.63 | 58.56 | 20.05 | 96.33  | 1.38 | Deltaproteobacteria | Proteobacteria  | Desulfovibrio sp.            |

|                     |           |    |      |        |       |       |       |      |                |                |                                     |
|---------------------|-----------|----|------|--------|-------|-------|-------|------|----------------|----------------|-------------------------------------|
| Sample_A07_3.bin_15 | A073.M015 | 81 | 3.01 | 55.94  | 44.17 | 20.01 | 95.22 | 0.00 | Clostridiales  | Firmicutes     | Clostridium sp. TM06-18             |
| Sample_A22_3.bin_15 | A223.M015 | 79 | 3.90 | 73.44  | 43.44 | 19.75 | 98.63 | 0.00 | Bacteria       | Bacteroidetes  | Odoribacter splanchnicus            |
| Sample_A05_1.bin_15 | A051.M015 | 32 | 1.73 | 95.51  | 60.00 | 19.74 | 88.59 | 0.67 | Clostridiales  | Firmicutes     | Clostridia bacterium                |
| Sample_A22_2.bin_15 | A222.M015 | 19 | 2.09 | 170.35 | 33.54 | 19.57 | 95.30 | 1.34 | Clostridiales  | Firmicutes     | Eubacterium sp. CAG:274             |
| Sample_B22_3.bin_15 | B223.M015 | 38 | 2.10 | 80.48  | 57.68 | 19.47 | 95.93 | 2.35 | Clostridiales  | Firmicutes     | Faecalibacterium prausnitzii        |
| Sample_B06_1.bin_15 | B061.M015 | 45 | 2.89 | 84.95  | 37.02 | 19.47 | 98.48 | 0.00 | Clostridiales  | Firmicutes     | Eubacterium sp. CAG:252             |
| Sample_A27_2.bin_15 | A272.M015 | 56 | 2.25 | 76.94  | 61.10 | 19.45 | 91.27 | 0.31 | Clostridiales  | Firmicutes     | Clostridiales bacterium             |
| Sample_B22_1.bin_15 | B221.M015 | 61 | 2.56 | 64.00  | 58.38 | 19.43 | 95.79 | 1.36 | Clostridiales  | Firmicutes     | Ruminococcaceae bacterium           |
| Sample_A01_1.bin_15 | A011.M015 | 64 | 2.91 | 71.70  | 46.14 | 19.40 | 93.98 | 0.32 | Clostridiales  | Firmicutes     | Lachnospiraceae bacterium AM48-27BH |
| Sample_A17_1.bin_15 | A171.M015 | 20 | 1.73 | 95.77  | 61.33 | 19.36 | 85.57 | 0.00 | Clostridiales  | Firmicutes     | Oscillibacter sp. CAG:155           |
| Sample_A01_2.bin_15 | A012.M015 | 57 | 1.90 | 47.24  | 62.16 | 19.26 | 99.37 | 0.63 | Proteobacteria | Proteobacteria | Sutterella sp. AM11-39              |
| Sample_B18_1.bin_15 | B181.M015 | 65 | 2.14 | 42.79  | 58.86 | 19.22 | 91.22 | 0.00 | Clostridiales  | Firmicutes     | Subdoligranulum variabile           |
| Sample_A18_1.bin_16 | A181.M016 | 31 | 2.58 | 105.96 | 43.76 | 19.01 | 92.61 | 0.67 | Clostridiales  | Firmicutes     | Coprococcus catus                   |
| Sample_B02_2.bin_16 | B022.M016 | 56 | 2.27 | 64.58  | 56.97 | 18.95 | 96.42 | 0.67 | Clostridiales  | Firmicutes     | Firmicutes bacterium CAG:110        |
| Sample_A33_3.bin_16 | A333.M016 | 48 | 2.60 | 80.59  | 46.13 | 18.84 | 94.93 | 0.63 | Clostridiales  | Firmicutes     | Blautia sp. KGMB01111               |

|                     |           |     |      |        |       |       |       |      |                     |                    |                                    |
|---------------------|-----------|-----|------|--------|-------|-------|-------|------|---------------------|--------------------|------------------------------------|
| Sample_A31_1.bin_16 | A311.M016 | 52  | 2.30 | 56.53  | 44.98 | 18.67 | 87.34 | 1.27 | Clostridiales       | Firmicutes         | uncultured Blautia sp.             |
| Sample_A01_3.bin_16 | A013.M016 | 48  | 2.59 | 82.87  | 37.73 | 18.64 | 95.97 | 1.34 | Clostridiales       | Firmicutes         | uncultured Eubacterium sp.         |
| Sample_A02_3.bin_16 | A023.M016 | 24  | 2.48 | 149.26 | 42.91 | 18.56 | 99.31 | 0.00 | Clostridiales       | Firmicutes         | uncultured Ruminococcus sp.        |
| Sample_A03_2.bin_16 | A032.M016 | 37  | 2.10 | 76.20  | 36.70 | 18.51 | 89.93 | 1.51 | Clostridiales       | Firmicutes         | Anaerostipes hadrus                |
| Sample_A04_3.bin_16 | A043.M016 | 42  | 2.78 | 90.69  | 46.18 | 18.47 | 97.98 | 1.65 | Clostridiales       | Firmicutes         | Lachnospiraceae bacterium          |
| Sample_A22_2.bin_16 | A222.M016 | 26  | 1.99 | 94.77  | 49.04 | 18.39 | 99.26 | 0.18 | Bacteria            | Bacteroidetes      | Flavobacteriales bacterium         |
| Sample_A06_1.bin_16 | A061.M016 | 33  | 2.48 | 95.12  | 42.68 | 18.27 | 94.30 | 0.02 | Clostridiales       | Firmicutes         | uncultured Blautia sp.             |
| Sample_A01_2.bin_16 | A012.M016 | 26  | 2.76 | 223.84 | 41.83 | 18.17 | 98.65 | 0.00 | Clostridiales       | Firmicutes         | Eubacterium sp. CAG:38             |
| Sample_B21_3.bin_17 | B213.M017 | 27  | 2.08 | 90.80  | 41.75 | 18.13 | 91.57 | 1.11 | Lachnospiraceae     | Firmicutes         | Lachnospiraceae bacterium          |
| Sample_A31_3.bin_17 | A313.M017 | 49  | 2.48 | 60.73  | 59.26 | 17.98 | 97.27 | 0.00 | Clostridiales       | Firmicutes         | Subdoligranulum sp. 60_17          |
| Sample_A27_3.bin_17 | A273.M017 | 35  | 2.06 | 99.33  | 61.28 | 17.97 | 91.61 | 0.67 | Clostridiales       | Firmicutes         | Firmicutes bacterium CAG:176_63_11 |
| Sample_A01_2.bin_17 | A012.M017 | 56  | 2.53 | 64.40  | 29.13 | 17.93 | 98.87 | 1.12 | Bacteria            | Fusobacteriia      | Fusobacterium mortiferum           |
| Sample_A31_1.bin_17 | A311.M017 | 36  | 1.74 | 67.38  | 61.42 | 17.86 | 95.80 | 0.67 | Clostridiales       | Firmicutes         | Firmicutes bacterium CAG:129       |
| Sample_A09_2.bin_17 | A092.M017 | 101 | 3.07 | 54.14  | 52.33 | 17.84 | 97.31 | 0.00 | Clostridiales       | Firmicutes         | Eubacterium sp. CAG:115            |
| Sample_B16_2.bin_17 | B162.M017 | 47  | 3.43 | 105.94 | 71.62 | 17.81 | 99.48 | 1.38 | Actinomyce<br>tales | Actinobact<br>eria | Aeromicrobium sp. Leaf289          |

|                     |           |     |      |        |       |       |        |      |                     |                |                                 |
|---------------------|-----------|-----|------|--------|-------|-------|--------|------|---------------------|----------------|---------------------------------|
| Sample_A31_2.bin_17 | A312.M017 | 67  | 2.89 | 51.79  | 48.88 | 17.72 | 99.36  | 0.00 | Clostridiales       | Firmicutes     | uncultured Clostridium sp.      |
| Sample_A29_1.bin_17 | A291.M017 | 29  | 2.22 | 115.97 | 40.62 | 17.69 | 91.13  | 0.00 | Clostridiales       | Firmicutes     | Tyzzereella nexilis             |
| Sample_A24_1.bin_17 | A241.M017 | 188 | 5.59 | 44.16  | 59.72 | 17.67 | 93.91  | 4.05 | Bacteria            | Lentisphaerae  | Victivallis vadensis            |
| Sample_A02_3.bin_18 | A023.M018 | 20  | 1.99 | 142.24 | 38.39 | 17.64 | 95.97  | 0.00 | Clostridiales       | Firmicutes     | Anaeromassilibacillus sp. An250 |
| Sample_A18_2.bin_18 | A182.M018 | 58  | 2.40 | 52.94  | 56.76 | 17.64 | 99.10  | 0.67 | Clostridiales       | Firmicutes     | Clostridiales bacterium         |
| Sample_A31_3.bin_18 | A313.M018 | 29  | 1.09 | 55.14  | 26.74 | 17.60 | 86.51  | 0.00 | Bacteria            | Firmicutes     | Acholeplasma sp. CAG:878        |
| Sample_B02_2.bin_18 | B022.M018 | 119 | 4.35 | 48.05  | 47.92 | 17.53 | 82.73  | 1.27 | Clostridiales       | Firmicutes     | uncultured Clostridium sp.      |
| Sample_A03_2.bin_18 | A032.M018 | 39  | 2.09 | 81.30  | 58.29 | 17.41 | 94.40  | 0.00 | Clostridiales       | Firmicutes     | Clostridiales bacterium         |
| Sample_A29_1.bin_18 | A291.M018 | 37  | 2.15 | 97.09  | 60.05 | 17.39 | 89.93  | 0.00 | Clostridiales       | Firmicutes     | Clostridiales bacterium         |
| Sample_A06_3.bin_18 | A063.M018 | 108 | 3.27 | 44.11  | 38.53 | 17.29 | 97.35  | 0.00 | Bacteroidales       | Bacteroidetes  | Coprobacter fastidiosus         |
| Sample_A22_1.bin_18 | A221.M018 | 161 | 4.20 | 41.11  | 59.95 | 17.07 | 100.00 | 0.00 | Deltaproteobacteria | Proteobacteria | Bilophila wadsworthia           |
| Sample_B22_2.bin_18 | B222.M018 | 91  | 2.17 | 36.67  | 60.02 | 16.93 | 98.09  | 2.42 | Actinobacteria      | Actinobacteria | Collinsella aerofaciens         |
| Sample_A27_1.bin_18 | A271.M018 | 36  | 2.11 | 108.24 | 51.92 | 16.71 | 98.65  | 0.67 | Clostridiales       | Firmicutes     | Clostridium sp. CAG:169         |
| Sample_B21_2.bin_18 | B212.M018 | 78  | 2.11 | 44.88  | 60.06 | 16.57 | 96.77  | 0.81 | Actinobacteria      | Actinobacteria | Collinsella aerofaciens         |
| Sample_B16_3.bin_19 | B163.M019 | 142 | 1.89 | 17.45  | 33.89 | 16.57 | 99.05  | 0.00 | Bacteria            | Firmicutes     | Catenibacterium sp. AM22-15     |

|                     |           |     |      |        |       |       |        |      |                 |                |                              |
|---------------------|-----------|-----|------|--------|-------|-------|--------|------|-----------------|----------------|------------------------------|
| Sample_B21_3.bin_19 | B213.M019 | 51  | 5.13 | 167.20 | 42.61 | 16.50 | 98.37  | 0.11 | Bacteria        | Bacteroidetes  | Odoribacter sp. AF21-41      |
| Sample_A19_2.bin_19 | A192.M019 | 30  | 2.35 | 141.43 | 46.37 | 16.49 | 100.00 | 0.48 | Bacteroidetes   | Bacteroidetes  | Alistipes indistinctus       |
| Sample_A03_2.bin_19 | A032.M019 | 50  | 2.08 | 96.88  | 60.10 | 16.46 | 99.19  | 2.42 | Actinobacteria  | Actinobacteria | Collinsella sp. AM34-10      |
| Sample_A36_3.bin_19 | A363.M019 | 27  | 2.41 | 119.30 | 42.22 | 16.44 | 87.81  | 0.63 | Clostridiales   | Firmicutes     | Blautia obeum                |
| Sample_A27_2.bin_19 | A272.M019 | 5   | 1.21 | 621.57 | 27.73 | 16.37 | 93.25  | 1.28 | Bacteria        | Firmicutes     | Clostridium sp. CAG:417      |
| Sample_B15_3.bin_19 | B153.M019 | 44  | 2.86 | 99.70  | 37.34 | 16.33 | 97.98  | 0.00 | Clostridiales   | Firmicutes     | Lachnospira eligens          |
| Sample_A04_3.bin_19 | A043.M019 | 55  | 3.00 | 76.49  | 41.08 | 16.30 | 97.42  | 0.00 | Clostridiales   | Firmicutes     | Eubacterium sp.              |
| Sample_A02_2.bin_19 | A022.M019 | 26  | 1.90 | 125.91 | 47.90 | 16.24 | 94.63  | 0.00 | Clostridiales   | Firmicutes     | Ruminococcaceae bacterium    |
| Sample_A18_2.bin_19 | A182.M019 | 68  | 2.71 | 51.44  | 58.54 | 16.14 | 90.72  | 1.08 | Clostridia      | Firmicutes     | Clostridiales bacterium      |
| Sample_A07_2.bin_19 | A072.M019 | 64  | 1.98 | 60.49  | 39.48 | 15.93 | 98.50  | 0.88 | Pasteurellaceae | Proteobacteria | Haemophilus parainfluenzae   |
| Sample_A01_2.bin_19 | A012.M019 | 50  | 2.25 | 57.24  | 58.90 | 15.88 | 90.41  | 1.34 | Clostridiales   | Firmicutes     | Firmicutes bacterium CAG:170 |
| Sample_A23_2.bin_20 | A232.M020 | 12  | 1.93 | 196.86 | 45.41 | 15.86 | 88.70  | 0.12 | Actinobacteria  | Actinobacteria | Cryptobacterium sp. CAG:338  |
| Sample_B16_1.bin_20 | B161.M020 | 109 | 2.25 | 26.65  | 48.40 | 15.81 | 80.23  | 0.00 | Bacteroidales   | Bacteroidetes  | Prevotella sp. CAG:891       |
| Sample_B16_2.bin_20 | B162.M020 | 43  | 1.98 | 78.90  | 38.98 | 15.74 | 100.00 | 0.00 | Selenomonadales | Firmicutes     | Veillonella atypica          |
| Sample_B21_3.bin_20 | B213.M020 | 80  | 2.26 | 46.54  | 60.02 | 15.65 | 100.00 | 0.81 | Actinobacteria  | Actinobacteria | Collinsella aerofaciens      |

|                     |           |     |      |       |       |       |        |      |                     |                |                              |
|---------------------|-----------|-----|------|-------|-------|-------|--------|------|---------------------|----------------|------------------------------|
| Sample_A18_3.bin_20 | A183.M020 | 169 | 2.44 | 26.23 | 49.92 | 15.61 | 85.13  | 1.90 | Clostridiales       | Firmicutes     | Clostridium sp. AM33-3       |
| Sample_A07_2.bin_20 | A072.M020 | 75  | 2.64 | 46.25 | 26.79 | 15.57 | 93.99  | 0.00 | Clostridiales       | Firmicutes     | uncultured Clostridium sp.   |
| Sample_A18_2.bin_20 | A182.M020 | 84  | 2.60 | 55.76 | 63.75 | 15.53 | 98.12  | 0.89 | Deltaproteobacteria | Proteobacteria | Desulfovibrio piger          |
| Sample_A33_3.bin_20 | A333.M020 | 94  | 2.55 | 50.05 | 64.79 | 15.41 | 99.31  | 2.04 | Clostridiales       | Firmicutes     | Fournierella massiliensis    |
| Sample_B17_1.bin_21 | B171.M021 | 37  | 2.21 | 74.56 | 38.13 | 15.38 | 86.17  | 0.58 | Lachnospiraceae     | Firmicutes     | Ruminococcus sp. B05         |
| Sample_A07_3.bin_21 | A073.M021 | 348 | 2.58 | 11.16 | 27.42 | 15.17 | 84.48  | 0.00 | Bacteria            | Firmicutes     | Romboutsia ilealis           |
| Sample_A32_2.bin_21 | A322.M021 | 95  | 3.00 | 45.04 | 46.08 | 15.13 | 97.04  | 2.01 | Bacteroidales       | Bacteroidetes  | Porphyromonadaceae bacterium |
| Sample_A31_2.bin_21 | A312.M021 | 41  | 2.90 | 91.31 | 28.21 | 15.08 | 98.38  | 0.00 | Clostridiales       | Firmicutes     | Clostridium perfringens      |
| Sample_B16_1.bin_21 | B161.M021 | 99  | 4.25 | 60.63 | 42.38 | 14.95 | 95.69  | 0.32 | Bacteria            | Bacteroidetes  | Butyricimonas virosa         |
| Sample_A05_3.bin_21 | A053.M021 | 53  | 1.82 | 68.88 | 46.76 | 14.91 | 95.69  | 0.00 | Bacteria            | Proteobacteria | Azospirillum sp.             |
| Sample_A07_2.bin_22 | A072.M022 | 88  | 3.60 | 66.35 | 44.28 | 14.89 | 88.50  | 1.42 | Bacteria            | Firmicutes     | Clostridium innocuum         |
| Sample_B22_3.bin_22 | B223.M022 | 72  | 1.98 | 40.16 | 57.28 | 14.68 | 87.46  | 0.00 | Clostridiales       | Firmicutes     | Clostridiales bacterium      |
| Sample_A27_1.bin_22 | A271.M022 | 54  | 1.76 | 59.01 | 41.18 | 14.57 | 93.61  | 0.00 | Clostridiales       | Firmicutes     | Mogibacterium diversum       |
| Sample_A04_3.bin_22 | A043.M022 | 84  | 2.88 | 54.80 | 35.77 | 14.54 | 99.32  | 0.67 | Clostridiales       | Firmicutes     | Eubacterium sp.              |
| Sample_A31_2.bin_22 | A312.M022 | 221 | 3.44 | 28.32 | 64.42 | 14.54 | 100.00 | 0.81 | Actinobacteria      | Actinobacteria | Eggerthella lenta            |

|                     |           |     |      |        |       |       |        |      |                 |                |                                  |
|---------------------|-----------|-----|------|--------|-------|-------|--------|------|-----------------|----------------|----------------------------------|
| Sample_B17_3.bin_22 | B173.M022 | 34  | 2.28 | 96.71  | 45.40 | 14.49 | 96.61  | 0.74 | Lachnospiraceae | Firmicutes     | Roseburia sp. AM16-25            |
| Sample_A04_1.bin_22 | A041.M022 | 58  | 2.89 | 70.25  | 49.71 | 14.44 | 98.53  | 0.24 | Lachnospiraceae | Firmicutes     | Roseburia hominis                |
| Sample_A29_1.bin_22 | A291.M022 | 31  | 2.56 | 133.88 | 60.00 | 14.41 | 95.92  | 0.00 | Bacteroidetes   | Bacteroidetes  | Alistipes communis               |
| Sample_A31_1.bin_23 | A311.M023 | 235 | 2.49 | 15.28  | 50.03 | 14.37 | 86.39  | 4.84 | Clostridiales   | Firmicutes     | uncultured Clostridium sp.       |
| Sample_A22_2.bin_23 | A222.M023 | 146 | 2.56 | 39.19  | 48.65 | 14.30 | 100.00 | 0.11 | Proteobacteria  | Bacteroidetes  | Proteobacteria bacterium CAG:139 |
| Sample_A27_2.bin_23 | A272.M023 | 70  | 1.27 | 28.40  | 24.96 | 14.25 | 91.57  | 1.69 | Bacteria        | Firmicutes     | Clostridium sp. CAG:433          |
| Sample_A33_2.bin_23 | A332.M023 | 30  | 2.09 | 116.86 | 44.20 | 14.25 | 92.61  | 0.00 | Clostridiales   | Firmicutes     | Frisingicoccus caecimuris        |
| Sample_A27_1.bin_23 | A271.M023 | 50  | 3.43 | 89.36  | 42.21 | 14.21 | 81.59  | 0.56 | Bacteroidales   | Bacteroidetes  | Bacteroides sp. CAG:462          |
| Sample_A03_2.bin_23 | A032.M023 | 121 | 1.97 | 25.81  | 57.13 | 14.19 | 95.62  | 0.00 | Proteobacteria  | Proteobacteria | Sutterella sp. CAG:397           |
| Sample_B15_1.bin_23 | B151.M023 | 76  | 2.05 | 33.83  | 49.28 | 14.00 | 86.20  | 1.34 | Lachnospiraceae | Firmicutes     | uncultured Clostridium sp.       |
| Sample_A24_2.bin_23 | A242.M023 | 49  | 2.15 | 68.91  | 49.67 | 13.99 | 93.95  | 0.00 | Clostridiales   | Firmicutes     | Ruminococcus sp. OM06-36AC       |
| Sample_A27_2.bin_24 | A272.M024 | 52  | 2.32 | 58.69  | 62.01 | 13.67 | 95.30  | 2.68 | Clostridiales   | Firmicutes     | Lawsonibacter asaccharolyticus   |
| Sample_A27_1.bin_24 | A271.M024 | 53  | 2.28 | 62.74  | 57.62 | 13.62 | 91.05  | 0.67 | Clostridiales   | Firmicutes     | Firmicutes bacterium CAG:137     |
| Sample_B17_1.bin_24 | B171.M024 | 48  | 2.58 | 90.54  | 63.44 | 13.38 | 99.19  | 0.00 | Actinobacteria  | Actinobacteria | Asaccharobacter celatus          |
| Sample_B15_2.bin_24 | B152.M024 | 62  | 2.33 | 55.09  | 46.92 | 13.26 | 93.04  | 3.29 | Selenomonadales | Firmicutes     | Phascolarctobacterium faecium    |



|                     |           |     |      |       |       |       |       |      |                    |                |                              |
|---------------------|-----------|-----|------|-------|-------|-------|-------|------|--------------------|----------------|------------------------------|
| Sample_B24_3.bin_24 | B243.M024 | 109 | 5.43 | 67.98 | 56.33 | 13.20 | 94.70 | 0.55 | Enterobacteriaceae | Proteobacteria | Klebsiella oxytoca           |
| Sample_A18_2.bin_24 | A182.M024 | 38  | 1.70 | 58.40 | 48.64 | 12.92 | 89.14 | 1.01 | Clostridiales      | Firmicutes     | Eubacterium sp. CAG:841      |
| Sample_A32_2.bin_24 | A322.M024 | 226 | 2.51 | 18.05 | 34.48 | 12.85 | 85.02 | 0.60 | Bacilli            | Firmicutes     | Turicibacter sanguinis       |
| Sample_B02_2.bin_24 | B022.M024 | 57  | 2.65 | 80.46 | 54.98 | 12.71 | 98.38 | 0.00 | Clostridia         | Firmicutes     | Clostridia bacterium         |
| Sample_B16_1.bin_25 | B161.M025 | 64  | 2.09 | 69.05 | 49.83 | 12.71 | 94.35 | 0.00 | Clostridia         | Firmicutes     | Clostridiales bacterium      |
| Sample_A05_2.bin_25 | A052.M025 | 125 | 2.41 | 37.88 | 62.41 | 12.55 | 98.13 | 0.62 | Proteobacteria     | Proteobacteria | Sutterella wadsworthensis    |
| Sample_A32_1.bin_25 | A321.M025 | 67  | 3.39 | 65.46 | 45.38 | 12.51 | 87.50 | 0.00 | Bacteroidales      | Bacteroidetes  | Parabacteroides johnsonii    |
| Sample_B21_3.bin_25 | B213.M025 | 52  | 2.18 | 68.37 | 44.60 | 12.38 | 97.09 | 0.00 | Clostridiales      | Firmicutes     | Ruminococcus sp. CAG:488     |
| Sample_B14_1.bin_25 | B141.M025 | 75  | 2.58 | 46.01 | 44.48 | 12.36 | 87.60 | 1.55 | Lachnospiraceae    | Firmicutes     | Lachnospiraceae bacterium    |
| Sample_B12_2.bin_25 | B122.M025 | 64  | 1.64 | 42.07 | 52.67 | 12.36 | 87.84 | 0.34 | Clostridiales      | Firmicutes     | Firmicutes bacterium CAG:555 |
| Sample_A23_2.bin_25 | A232.M025 | 57  | 1.84 | 46.17 | 49.49 | 12.25 | 95.96 | 0.03 | Clostridia         | Firmicutes     | Clostridiales bacterium      |
| Sample_A04_3.bin_26 | A043.M026 | 41  | 2.22 | 58.73 | 62.16 | 12.21 | 91.27 | 0.00 | Clostridiales      | Firmicutes     | uncultured Oscillibacter sp. |
| Sample_A19_1.bin_26 | A191.M026 | 255 | 3.11 | 16.98 | 56.04 | 11.95 | 97.96 | 0.00 | Bacteria           | Synergistetes  | Cloacibacillus porcorum      |
| Sample_A03_2.bin_26 | A032.M026 | 103 | 2.12 | 34.71 | 62.95 | 11.91 | 99.02 | 2.37 | Bifidobacteriaceae | Actinobacteria | Bifidobacterium bifidum      |
| Sample_B15_1.bin_26 | B151.M026 | 255 | 2.10 | 11.23 | 58.88 | 11.90 | 86.05 | 3.44 | Clostridiales      | Firmicutes     | Faecalibacterium prausnitzii |

|                     |           |     |      |       |       |       |       |      |                    |                |                            |
|---------------------|-----------|-----|------|-------|-------|-------|-------|------|--------------------|----------------|----------------------------|
| Sample_B17_3.bin_26 | B173.M026 | 57  | 1.65 | 49.75 | 43.13 | 11.86 | 91.72 | 0.00 | Clostridiales      | Firmicutes     | Ruminococcaceae bacterium  |
| Sample_A29_2.bin_26 | A292.M026 | 87  | 1.84 | 34.32 | 52.68 | 11.85 | 97.95 | 0.00 | Lactobacillales    | Firmicutes     | Lactobacillus fermentum    |
| Sample_B21_2.bin_26 | B212.M026 | 79  | 1.64 | 34.59 | 40.21 | 11.82 | 80.60 | 0.58 | Streptococcus      | Firmicutes     | Streptococcus salivarius   |
| Sample_A31_2.bin_26 | A312.M026 | 150 | 2.05 | 19.35 | 56.59 | 11.78 | 91.39 | 0.67 | Clostridiales      | Firmicutes     | Ruminococcaceae bacterium  |
| Sample_B16_3.bin_26 | B163.M026 | 81  | 2.32 | 39.07 | 45.39 | 11.65 | 86.20 | 2.51 | Lachnospiraceae    | Firmicutes     | uncultured Clostridium sp. |
| Sample_A04_1.bin_26 | A041.M026 | 68  | 1.95 | 33.88 | 57.20 | 11.38 | 94.73 | 0.67 | Clostridiales      | Firmicutes     | Clostridiales bacterium    |
| Sample_A04_2.bin_26 | A042.M026 | 129 | 2.72 | 31.65 | 53.83 | 11.37 | 97.03 | 1.01 | Clostridiales      | Firmicutes     | Ruminococcaceae bacterium  |
| Sample_A01_2.bin_26 | A012.M026 | 164 | 2.05 | 22.23 | 58.93 | 11.35 | 90.82 | 2.06 | Clostridiales      | Firmicutes     | Butyricoccus sp. OM04-18BH |
| Sample_A29_1.bin_27 | A291.M027 | 78  | 1.51 | 31.41 | 46.70 | 11.25 | 93.43 | 0.00 | Firmicutes         | Firmicutes     | Veillonellaceae bacterium  |
| Sample_B16_1.bin_27 | B161.M027 | 79  | 1.94 | 38.66 | 37.26 | 11.23 | 95.46 | 0.00 | Clostridiales      | Firmicutes     | Ruminococcus sp. CAG:624   |
| Sample_A23_2.bin_27 | A232.M027 | 77  | 1.84 | 50.64 | 60.12 | 11.23 | 84.22 | 0.67 | Clostridiales      | Firmicutes     | Evtepia gabavorous         |
| Sample_A33_1.bin_27 | A331.M027 | 187 | 1.79 | 12.74 | 53.62 | 11.18 | 96.15 | 3.29 | Clostridia         | Firmicutes     | Clostridia bacterium       |
| Sample_B17_1.bin_27 | B171.M027 | 136 | 3.34 | 31.34 | 56.29 | 11.05 | 80.44 | 1.58 | Enterobacteriaceae | Proteobacteria | Leclercia adecarboxylata   |
| Sample_A28_3.bin_27 | A283.M027 | 85  | 2.20 | 38.08 | 62.55 | 10.99 | 97.98 | 0.81 | Actinobacteria     | Actinobacteria | Olsenella sp. AF21-51      |
| Sample_A27_1.bin_27 | A271.M027 | 214 | 2.13 | 14.27 | 59.92 | 10.90 | 95.34 | 1.61 | Actinobacteria     | Actinobacteria | Collinsella aerofaciens    |

|                     |           |     |      |       |       |       |       |      |                    |                |                            |
|---------------------|-----------|-----|------|-------|-------|-------|-------|------|--------------------|----------------|----------------------------|
| Sample_A03_2.bin_27 | A032.M027 | 173 | 3.32 | 27.73 | 42.89 | 10.85 | 89.76 | 0.00 | Bacteria           | Bacteroidetes  | Butyricimonas faecalis     |
| Sample_A07_2.bin_27 | A072.M027 | 119 | 1.74 | 29.36 | 58.14 | 10.84 | 90.21 | 0.00 | Clostridiales      | Firmicutes     | Oscillibacter sp. 57_20    |
| Sample_A31_3.bin_27 | A313.M027 | 361 | 2.16 | 7.10  | 51.22 | 10.84 | 89.82 | 1.73 | Clostridiales      | Firmicutes     | Clostridium leptum         |
| Sample_B21_3.bin_27 | B213.M027 | 99  | 2.36 | 45.87 | 58.73 | 10.81 | 99.20 | 0.98 | Bifidobacteriaceae | Actinobacteria | Bifidobacterium sp. MSTE12 |
| Sample_B15_1.bin_27 | B151.M027 | 209 | 2.27 | 17.00 | 55.26 | 10.81 | 88.91 | 0.34 | Clostridiales      | Firmicutes     | Clostridiales bacterium    |
| Sample_A12_3.bin_27 | A123.M027 | 164 | 2.94 | 23.93 | 46.27 | 10.80 | 90.31 | 2.31 | Prevotella         | Bacteroidetes  | Prevotella sp. CAG:732     |
| Sample_A27_2.bin_27 | A272.M027 | 58  | 2.01 | 51.54 | 44.05 | 10.66 | 86.39 | 0.00 | Clostridiales      | Firmicutes     | Clostridium sp. CAG:167    |
| Sample_A22_2.bin_27 | A222.M027 | 100 | 2.42 | 33.21 | 55.81 | 10.63 | 91.61 | 0.67 | Clostridiales      | Firmicutes     | Clostridiales bacterium    |
| Sample_A27_3.bin_28 | A273.M028 | 458 | 2.81 | 8.03  | 43.55 | 10.56 | 88.19 | 2.48 | Lactobacillales    | Firmicutes     | Enterococcus casseliflavus |
| Sample_B16_2.bin_28 | B162.M028 | 68  | 2.10 | 43.67 | 46.39 | 10.55 | 82.24 | 0.88 | Lachnospiraceae    | Firmicutes     | Sellimonas intestinalis    |
| Sample_A33_2.bin_28 | A332.M028 | 200 | 2.43 | 18.11 | 50.22 | 10.30 | 85.44 | 1.29 | Clostridiales      | Firmicutes     | Clostridium sp. AF27-2AA   |
| Sample_B21_3.bin_28 | B213.M028 | 142 | 2.06 | 19.40 | 56.71 | 10.23 | 86.62 | 0.67 | Clostridiales      | Firmicutes     | Clostridiales bacterium    |
| Sample_A03_2.bin_28 | A032.M028 | 571 | 4.51 | 10.95 | 52.21 | 10.16 | 94.79 | 3.73 | Enterobacteriaceae | Proteobacteria | uncultured Citrobacter sp. |
| Sample_B11_2.bin_28 | B112.M028 | 180 | 2.19 | 20.84 | 51.81 | 10.14 | 94.12 | 2.81 | Clostridiales      | Firmicutes     | Butyricococcus porcorum    |
| Sample_A27_2.bin_29 | A272.M029 | 423 | 4.71 | 14.79 | 51.03 | 10.08 | 91.94 | 1.38 | Clostridiales      | Firmicutes     | Enterocloster aldensis     |

|                     |           |     |      |       |       |      |       |      |                 |                |                                     |
|---------------------|-----------|-----|------|-------|-------|------|-------|------|-----------------|----------------|-------------------------------------|
| Sample_B17_1.bin_29 | B171.M029 | 572 | 3.71 | 8.23  | 60.05 | 9.90 | 82.54 | 3.09 | Actinobacteria  | Actinobacteria | Eggerthella lenta                   |
| Sample_A09_2.bin_29 | A092.M029 | 244 | 2.29 | 14.07 | 51.58 | 9.69 | 88.09 | 4.11 | Clostridiales   | Firmicutes     | uncultured Clostridium sp.          |
| Sample_B15_1.bin_30 | B151.M030 | 368 | 2.83 | 10.29 | 46.02 | 9.69 | 84.57 | 3.76 | Lachnospiraceae | Firmicutes     | Lachnospiraceae bacterium           |
| Sample_B16_1.bin_30 | B161.M030 | 142 | 1.65 | 17.03 | 60.66 | 9.61 | 80.66 | 0.34 | Clostridiales   | Firmicutes     | Evetpia gabavorous                  |
| Sample_A27_2.bin_30 | A272.M030 | 182 | 2.32 | 19.81 | 44.74 | 9.54 | 96.64 | 0.00 | Clostridiales   | Firmicutes     | Ruminococcaceae bacterium           |
| Sample_A19_2.bin_30 | A192.M030 | 338 | 1.79 | 6.60  | 57.11 | 9.53 | 82.36 | 2.07 | Clostridiales   | Firmicutes     | Clostridium sp. CAG:242             |
| Sample_B02_2.bin_30 | B022.M030 | 168 | 1.90 | 20.26 | 57.63 | 9.53 | 86.18 | 2.37 | Clostridiales   | Firmicutes     | Oscillibacter sp.                   |
| Sample_A03_2.bin_31 | A032.M031 | 97  | 1.95 | 27.87 | 43.07 | 9.52 | 85.11 | 0.00 | Clostridiales   | Firmicutes     | Clostridiales bacterium             |
| Sample_B24_1.bin_31 | B241.M031 | 177 | 1.70 | 12.30 | 49.23 | 9.50 | 96.23 | 0.00 | Bacteria        | Proteobacteria | Azospirillum sp. CAG:239            |
| Sample_A32_1.bin_31 | A321.M031 | 278 | 2.02 | 9.02  | 64.65 | 9.35 | 86.45 | 2.01 | Clostridiales   | Firmicutes     | Oscillibacter sp. PC13              |
| Sample_A23_3.bin_31 | A233.M031 | 284 | 2.06 | 8.52  | 56.25 | 9.26 | 87.70 | 0.89 | Clostridiales   | Firmicutes     | Ruminococcaceae bacterium AM28-23LB |
| Sample_A12_3.bin_32 | A123.M032 | 173 | 1.93 | 14.37 | 58.66 | 9.02 | 85.79 | 1.74 | Clostridiales   | Firmicutes     | Ruminococcaceae bacterium           |
| Sample_B24_1.bin_32 | B241.M032 | 332 | 2.15 | 8.71  | 63.58 | 9.02 | 90.47 | 0.75 | Proteobacteria  | Proteobacteria | Sutterella megalosphaeroides        |
| Sample_A19_1.bin_33 | A191.M033 | 494 | 3.97 | 11.89 | 65.19 | 8.99 | 93.06 | 3.51 | Actinobacteria  | Actinobacteria | Eggerthella sinensis                |
| Sample_A31_2.bin_33 | A312.M033 | 303 | 2.23 | 9.20  | 63.03 | 8.80 | 88.44 | 2.51 | Clostridiales   | Firmicutes     | Clostridiales bacterium             |

|                     |           |     |      |      |       |      |       |      |                 |                |                              |
|---------------------|-----------|-----|------|------|-------|------|-------|------|-----------------|----------------|------------------------------|
| Sample_A27_1.bin_34 | A271.M034 | 353 | 2.14 | 7.51 | 50.60 | 8.61 | 83.73 | 0.71 | Clostridiales   | Firmicutes     | Firmicutes bacterium CAG:238 |
| Sample_A27_2.bin_35 | A272.M035 | 363 | 2.25 | 7.76 | 52.37 | 8.48 | 80.62 | 3.76 | Lachnospiraceae | Firmicutes     | Lachnoclostridium sp. An118  |
| Sample_A27_1.bin_37 | A271.M037 | 243 | 1.74 | 8.96 | 33.27 | 8.00 | 86.72 | 0.06 | Clostridiales   | Firmicutes     | Ruminococcus sp.             |
| Sample_A03_1.bin_38 | A031.M038 | 260 | 1.70 | 8.14 | 53.69 | 7.92 | 80.80 | 1.01 | Clostridiales   | Firmicutes     | Ruminococcaceae bacterium    |
| Sample_A31_2.bin_38 | A312.M038 | 234 | 1.56 | 8.10 | 51.56 | 7.89 | 81.77 | 1.34 | Clostridiales   | Firmicutes     | Clostridiales bacterium      |
| Sample_A27_1.bin_49 | A271.M049 | 216 | 1.48 | 8.68 | 57.83 | 7.87 | 80.11 | 0.00 | Clostridiales   | Firmicutes     | Clostridia bacterium         |
| Sample_A27_1.bin_56 | A271.M056 | 325 | 1.59 | 5.48 | 39.63 | 7.23 | 82.53 | 1.78 | Pasteurellaceae | Proteobacteria | Haemophilus parainfluenzae   |
