# Supplementary material for: Bifidobacterium lactis Probio-M8 Adjuvant Treatment Confers Added Benefits to Patients with Coronary Artery Disease via Target Modulation of the Gut-Heart/-Brain Axes
Source: PubMed Central journal article supplement (PMC9040731; doi:10.1128/msystems.00100-22), 2022-03-28
Supplement: msystems.00100-22-st005.pdf [file msystems.00100-22-st005.pdf]

Table S5. Significant differential species-level genome bins (SGBs) between probiotic and placebo groups at different time points  
 Remarks: pro, probiotic group; pla, placebo group

| Probiotic group   |                                 |                                                         |                      |                       |               |                |                 |                           |                             |                              |                                |
|-------------------|---------------------------------|---------------------------------------------------------|----------------------|-----------------------|---------------|----------------|-----------------|---------------------------|-----------------------------|------------------------------|--------------------------------|
| Differential SGBs |                                 | statistics (Centered Log-ration transformed abundances) |                      |                       |               |                |                 | Corrected P-value, T-test |                             |                              |                                |
| SGBs ID           | Taxonomy                        | Mean_<br>pro_0d                                         | Mean_<br>pro_90<br>d | Mean_<br>pro_18<br>0d | SD_pro<br>_0d | SD_pro<br>_90d | SD_pro<br>_180d | pro_0d<br>vs<br>pla_0d    | pro_0d<br>vs<br>pro_90<br>d | pro_0d<br>vs<br>pro_18<br>0d | pro_90<br>d vs<br>pro_18<br>0d |
| A222.M<br>001     | Bifidobacterium<br>animalis     | -0.63                                                   | 0.97                 | 1.05                  | 0.49          | 2.42           | 2.14            | 0.240                     | 0.042                       | 0.022                        | 0.838                          |
| A191.M<br>001     | Bacteroides sp.<br>CAG:20       | -0.31                                                   | 0.62                 | -0.15                 | 1.49          | 1.75           | 1.53            | 0.890                     | 0.041                       | 0.756                        | 0.079                          |
| B201.M<br>002     | Eubacterium sp.<br>CAG:115      | 0.20                                                    | -0.08                | -0.19                 | 0.94          | 0.39           | 0.00            | 0.352                     | 0.351                       | 0.039                        | 0.131                          |
| B143.M<br>007     | Roseburia<br>inulinivorans      | 0.61                                                    | -0.20                | -0.14                 | 1.35          | 1.63           | 1.36            | 0.243                     | 0.066                       | 0.039                        | 0.871                          |
| A273.M<br>017     | Ruminococcacea<br>e bacterium   | -0.11                                                   | -0.04                | 0.39                  | 0.30          | 0.58           | 1.13            | 0.800                     | 0.333                       | 0.040                        | 0.292                          |
| A061.M<br>008     | Bifidobacterium<br>bifidum      | -0.12                                                   | -0.17                | 0.38                  | 0.69          | 0.31           | 1.15            | 0.410                     | 0.757                       | 0.027                        | 0.049                          |
| A073.M<br>001     | Bifidobacterium<br>adolescentis | -0.19                                                   | -0.13                | 0.78                  | 1.20          | 1.42           | 1.80            | 0.620                     | 0.851                       | 0.041                        | 0.050                          |
| B163.M<br>001     | Alistipes sp.<br>AF17-16        | -0.15                                                   | 0.43                 | -0.21                 | 0.86          | 1.30           | 0.83            | 0.520                     | 0.06                        | 0.82                         | 0.038                          |

| Between the probiotic and placebo groups |                           |                 |                      |                       |                 |                      |                       |               |                |                 |               |                |                 | Corrected P-value, Wilcoxon-test |                          |                                 |
|------------------------------------------|---------------------------|-----------------|----------------------|-----------------------|-----------------|----------------------|-----------------------|---------------|----------------|-----------------|---------------|----------------|-----------------|----------------------------------|--------------------------|---------------------------------|
| SGBs ID                                  | Taxonomy                  | Mean_<br>pro_0d | Mean_<br>pro_90<br>d | Mean_<br>pro_18<br>0d | Mean_<br>pla_0d | Mean_<br>pla_90<br>d | Mean_<br>pla_18<br>0d | SD_pro<br>_0d | SD_pro<br>_90d | SD_pro<br>_180d | SD_pla<br>_0d | SD_pla_<br>90d | SD_pla_<br>180d | pro_0d<br>vs<br>pla_0d           | pro_90d<br>vs<br>pla_90d | pro_180<br>d vs<br>pla_180<br>d |
| A061.M<br>002                            | Eubacterium sp.<br>CAG:76 | 0.34            | 0.67                 | 0.47                  | -0.65           | -0.73                | -0.70                 | 1.85          | 1.75           | 1.53            | 1.54          | 1.39           | 1.44            | 0.053                            | 0.024                    | 0.022                           |

|               |                                    |       |       |      |       |       |       |      |      |      |      |      |      |       |       |       |
|---------------|------------------------------------|-------|-------|------|-------|-------|-------|------|------|------|------|------|------|-------|-------|-------|
| A222.M<br>001 | Bifidobacterium<br>animalis        | -0.63 | 0.97  | 1.05 | -0.78 | -0.64 | -0.54 | 0.49 | 2.42 | 2.14 | 0.00 | 0.56 | 0.96 | 0.240 | 0.010 | 0.039 |
| A212.M<br>010 | Prevotella copri                   | 0.71  | 0.99  | 0.73 | -1.21 | -1.18 | -1.03 | 3.26 | 3.34 | 3.50 | 2.83 | 2.84 | 3.07 | 0.056 | 0.013 | 0.083 |
| A062.M<br>007 | Ruminococcus sp.<br>OM06-36AC      | 0.12  | 0.48  | 0.18 | -0.32 | -0.46 | -0.32 | 1.28 | 1.56 | 1.47 | 0.67 | 0.28 | 0.61 | 0.260 | 0.031 | 0.260 |
| B173.M<br>011 | Fusicatenibacter<br>saccharivorans | 0.27  | 0.42  | 0.07 | -0.41 | -0.51 | -0.14 | 1.51 | 1.46 | 1.47 | 1.59 | 1.57 | 1.64 | 0.100 | 0.034 | 0.780 |
| A123.M<br>002 | Coprococcus sp.<br>OM04-5BH        | -0.10 | 0.49  | 0.02 | -0.09 | -0.39 | -0.10 | 1.01 | 1.78 | 1.37 | 1.23 | 0.00 | 1.18 | 0.840 | 0.048 | 0.790 |
| A271.M<br>018 | Clostridiales<br>bacterium         | 0.15  | 0.17  | 0.08 | -0.19 | -0.19 | -0.19 | 0.82 | 0.73 | 0.70 | 0.00 | 0.00 | 0.00 | 0.085 | 0.048 | 0.085 |
| A282.M<br>004 | Megamonas<br>funiformis            | 0.07  | 0.63  | 0.23 | -0.36 | -0.60 | -0.35 | 1.77 | 2.32 | 1.74 | 1.11 | 0.55 | 1.14 | 0.440 | 0.050 | 0.280 |
| B061.M<br>015 | Clostridiales<br>bacterium         | -0.07 | 0.28  | 0.51 | -0.40 | 0.04  | -0.66 | 1.15 | 1.32 | 1.41 | 1.23 | 1.61 | 0.73 | 0.250 | 0.440 | 0.049 |
| A283.M<br>014 | Lachnospiraceae<br>bacterium       | 0.16  | 0.10  | 0.24 | -0.25 | -0.19 | -0.26 | 0.81 | 0.83 | 0.91 | 0.35 | 0.35 | 0.23 | 0.057 | 0.430 | 0.027 |
| A273.M<br>017 | Ruminococcacea<br>e bacterium      | -0.11 | -0.04 | 0.39 | 0.01  | -0.17 | -0.17 | 0.30 | 0.58 | 1.13 | 0.76 | 0.00 | 0.00 | 0.800 | 0.240 | 0.028 |
| A073.M<br>001 | Bifidobacterium<br>adolescentis    | -0.19 | -0.13 | 0.78 | -0.34 | 0.02  | -0.33 | 1.20 | 1.42 | 1.80 | 1.05 | 1.70 | 1.06 | 0.620 | 0.860 | 0.033 |
| A072.M<br>027 | uncultured<br>Clostridium sp.      | -0.01 | 0.11  | 0.35 | -0.26 | -0.15 | -0.22 | 1.05 | 1.07 | 0.83 | 0.98 | 0.99 | 0.86 | 0.520 | 0.390 | 0.046 |
| A023.M<br>005 | Roseburia sp.<br>CAG:197           | 0.18  | 0.05  | 0.32 | -0.26 | -0.26 | -0.26 | 0.98 | 0.88 | 1.29 | 0.00 | 0.00 | 0.00 | 0.051 | 0.085 | 0.048 |
| A322.M<br>021 | Subdoligranulum<br>sp. 60_17       | 0.11  | 0.14  | 0.19 | -0.25 | -0.11 | -0.25 | 0.90 | 0.93 | 1.02 | 0.00 | 0.31 | 0.00 | 0.085 | 0.660 | 0.048 |
| A053.M<br>001 | Eggerthella sp.<br>CAG:298         | -0.06 | 0.15  | 0.26 | -0.18 | -0.09 | -0.22 | 0.58 | 0.91 | 1.09 | 0.25 | 0.34 | 0.16 | 0.850 | 0.910 | 0.050 |
| A192.M<br>030 | Butyricoccus<br>porcorum           | 0.06  | -0.02 | 0.32 | -0.18 | -0.18 | -0.15 | 0.68 | 0.60 | 0.94 | 0.00 | 0.00 | 0.14 | 0.140 | 0.140 | 0.050 |

|               |                               |       |       |       |      |      |      |      |      |      |      |      |      |       |       |       |
|---------------|-------------------------------|-------|-------|-------|------|------|------|------|------|------|------|------|------|-------|-------|-------|
| A071.M<br>001 | Parabacteroides<br>distasonis | -0.27 | -0.20 | -0.54 | 0.37 | 0.46 | 0.60 | 1.24 | 0.82 | 1.11 | 1.17 | 0.96 | 1.01 | 0.088 | 0.045 | 0.054 |
| B062.M<br>001 | Bacteroides<br>uniformis      | -0.27 | -0.15 | -0.74 | 0.32 | 0.70 | 0.61 | 1.43 | 1.22 | 1.38 | 1.54 | 1.19 | 1.22 | 0.110 | 0.050 | 0.053 |
| B182.M<br>012 | Parabacteroides<br>johnsonii  | -0.19 | -0.22 | -0.16 | 0.23 | 0.35 | 0.23 | 0.44 | 0.32 | 0.60 | 1.14 | 1.22 | 1.15 | 0.143 | 0.050 | 0.158 |
| B213.M<br>017 | Flavonifractor<br>plautii     | -0.20 | -0.30 | -0.37 | 0.44 | 0.49 | 0.31 | 1.04 | 0.98 | 0.77 | 1.37 | 1.31 | 1.36 | 0.109 | 0.050 | 0.132 |
