# Supplementary material for: Bifidobacterium lactis Probio-M8 Adjuvant Treatment Confers Added Benefits to Patients with Coronary Artery Disease via Target Modulation of the Gut-Heart/-Brain Axes
Source: PubMed Central journal article supplement (PMC9040731; doi:10.1128/msystems.00100-22), 2022-03-28
Supplement: msystems.00100-22-st006.pdf [file msystems.00100-22-st006.pdf]

Table S6. Distribution of species-level genome bins (SGBs) and predicted metabolic modules across phyla

| Module group | Module ID | Annotation                                     | Total number of | Percentage (%) | Actinobacteria | Bacteroidetes | Melainabacteria | Cyanobacteria | Elusimicrobia | Euryarchaeota | Firmicutes | Fusobacteria | Lentisphaerae | Proteobacteria | Synergistetes | Tenericutes | Verrucomicrobia |
|--------------|-----------|------------------------------------------------|-----------------|----------------|----------------|---------------|-----------------|---------------|---------------|---------------|------------|--------------|---------------|----------------|---------------|-------------|-----------------|
|              | ADM001    | phenylalanine degradation                      | 21              | 4.77           | 0              | 0             | 1               | 0             | 0             | 0             | 1          | 0            | 0             | 18             | 0             | 0           | 1               |
|              | ADM010    | isoleucine degradation                         | 44              | 10.00          | 1              | 3             | 0               | 0             | 0             | 0             | 25         | 0            | 0             | 15             | 0             | 0           | 0               |
|              | ADM011    | leucine degradation                            | 9               | 2.05           | 1              | 5             | 0               | 0             | 0             | 0             | 3          | 0            | 0             | 0              | 0             | 0           | 0               |
|              | ADM012    | methionine degradation I                       | 294             | 66.74          | 17             | 41            | 2               | 1             | 1             | 1             | 193        | 1            | 1             | 31             | 2             | 1           | 3               |
|              | ADM013    | methionine degradation II                      | 38              | 8.64           | 3              | 0             | 0               | 0             | 0             | 0             | 28         | 2            | 0             | 4              | 1             | 0           | 0               |
|              | ADM014    | proline degradation                            | 35              | 7.95           | 1              | 12            | 0               | 0             | 0             | 0             | 3          | 0            | 0             | 15             | 1             | 0           | 3               |
|              | ADM015    | valine degradation                             | 25              | 5.68           | 1              | 0             | 0               | 0             | 0             | 0             | 9          | 0            | 0             | 15             | 0             | 0           | 0               |
|              | ADM017    | cysteine biosynthesis/homocysteine degradation | 22              | 5.00           | 0              | 0             | 0               | 0             | 0             | 0             | 13         | 0            | 0             | 9              | 0             | 0           | 0               |

|                                             |        |                          |     |       |    |    |   |   |   |   |     |   |   |    |   |   |   |
|---------------------------------------------|--------|--------------------------|-----|-------|----|----|---|---|---|---|-----|---|---|----|---|---|---|
| <b>Amino acid degradation modules (ADM)</b> | ADM018 | cysteine degradation I   | 415 | 94.32 | 24 | 47 | 2 | 1 | 1 | 1 | 302 | 2 | 0 | 29 | 2 | 1 | 3 |
|                                             | ADM019 | cysteine degradation II  | 23  | 5.23  | 2  | 0  | 0 | 0 | 0 | 0 | 8   | 0 | 0 | 13 | 0 | 0 | 0 |
|                                             | ADM002 | tyrosine degradation I   | 15  | 3.41  | 0  | 0  | 0 | 0 | 0 | 0 | 7   | 0 | 0 | 7  | 0 | 0 | 1 |
|                                             | ADM020 | glutamine degradation I  | 77  | 17.50 | 2  | 31 | 0 | 0 | 0 | 0 | 26  | 2 | 0 | 13 | 0 | 0 | 3 |
|                                             | ADM021 | glutamine degradation II | 390 | 88.64 | 28 | 51 | 2 | 1 | 1 | 0 | 270 | 2 | 1 | 29 | 2 | 0 | 3 |
|                                             | ADM022 | serine degradation       | 334 | 75.91 | 26 | 44 | 2 | 1 | 1 | 0 | 218 | 2 | 1 | 34 | 2 | 0 | 3 |
|                                             | ADM023 | threonine degradation I  | 227 | 51.59 | 7  | 15 | 0 | 0 | 0 | 0 | 180 | 2 | 0 | 19 | 1 | 0 | 3 |
|                                             | ADM024 | threonine degradation II | 383 | 87.05 | 27 | 45 | 2 | 1 | 1 | 0 | 268 | 2 | 1 | 31 | 2 | 0 | 3 |
|                                             | ADM025 | arginine degradation I   | 230 | 52.27 | 0  | 48 | 2 | 1 | 1 | 1 | 142 | 0 | 0 | 31 | 1 | 0 | 3 |

|        |                          |     |       |    |    |   |   |   |   |     |   |   |    |   |   |   |
|--------|--------------------------|-----|-------|----|----|---|---|---|---|-----|---|---|----|---|---|---|
| ADM026 | arginine degradation II  | 14  | 3.18  | 0  | 0  | 0 | 0 | 0 | 0 | 0   | 0 | 0 | 14 | 0 | 0 | 0 |
| ADM028 | arginine degradation IV  | 31  | 7.05  | 0  | 12 | 0 | 0 | 0 | 0 | 11  | 0 | 0 | 7  | 0 | 0 | 1 |
| ADM029 | arginine degradation V   | 172 | 39.09 | 20 | 4  | 0 | 0 | 0 | 0 | 129 | 0 | 0 | 17 | 2 | 0 | 0 |
| ADM003 | tyrosine degradation II  | 11  | 2.50  | 0  | 0  | 0 | 0 | 0 | 0 | 3   | 1 | 0 | 7  | 0 | 0 | 0 |
| ADM030 | histidine degradation    | 65  | 14.77 | 0  | 24 | 0 | 0 | 0 | 0 | 25  | 1 | 0 | 13 | 2 | 0 | 0 |
| ADM031 | lysine degradation I     | 21  | 4.77  | 0  | 5  | 0 | 0 | 0 | 0 | 15  | 1 | 0 | 0  | 0 | 0 | 0 |
| ADM032 | lysine degradation II    | 31  | 7.05  | 0  | 0  | 1 | 1 | 0 | 0 | 13  | 0 | 0 | 15 | 1 | 0 | 0 |
| ADM004 | aspartate degradation I  | 318 | 72.27 | 28 | 50 | 1 | 0 | 1 | 1 | 211 | 2 | 1 | 18 | 2 | 0 | 3 |
| ADM005 | aspartate degradation II | 129 | 29.32 | 5  | 29 | 0 | 0 | 0 | 0 | 61  | 2 | 1 | 31 | 0 | 0 | 0 |

|        |                           |     |       |   |    |   |   |   |   |    |   |   |    |   |   |   |
|--------|---------------------------|-----|-------|---|----|---|---|---|---|----|---|---|----|---|---|---|
| ADM006 | glutamate degradation III | 21  | 4.77  | 0 | 0  | 0 | 0 | 0 | 0 | 13 | 2 | 0 | 6  | 0 | 0 | 0 |
| ADM007 | alanine degradation I     | 30  | 6.82  | 1 | 0  | 0 | 0 | 0 | 0 | 13 | 0 | 0 | 16 | 0 | 0 | 0 |
| ADM008 | alanine degradation II    | 79  | 17.95 | 6 | 31 | 0 | 0 | 0 | 0 | 38 | 1 | 0 | 1  | 2 | 0 | 0 |
| ADM009 | glycine degradation       | 114 | 25.83 | 2 | 42 | 2 | 1 | 1 | 0 | 43 | 0 | 1 | 18 | 1 | 0 | 3 |

|        |                          |     |       |    |    |   |   |   |   |     |   |   |    |   |   |   |
|--------|--------------------------|-----|-------|----|----|---|---|---|---|-----|---|---|----|---|---|---|
| CDM001 | arabinoxylan degradation | 227 | 51.59 | 6  | 32 | 0 | 0 | 0 | 0 | 175 | 1 | 1 | 10 | 0 | 0 | 2 |
| CDM002 | fructan degradation      | 191 | 43.41 | 13 | 32 | 0 | 0 | 0 | 0 | 129 | 1 | 1 | 15 | 0 | 0 | 0 |
| CDM003 | pectin degradation I     | 20  | 4.55  | 0  | 2  | 0 | 0 | 0 | 0 | 15  | 1 | 0 | 2  | 0 | 0 | 0 |
| CDM004 | pectine degradation II   | 40  | 9.09  | 0  | 11 | 0 | 0 | 0 | 0 | 23  | 1 | 0 | 5  | 0 | 0 | 0 |

|                                               |        |                                   |     |       |    |    |   |   |   |   |     |   |   |    |   |   |   |
|-----------------------------------------------|--------|-----------------------------------|-----|-------|----|----|---|---|---|---|-----|---|---|----|---|---|---|
| <b>Carbohydrate degradation modules (CDM)</b> | CDM005 | starch degradation                | 249 | 56.52 | 8  | 48 | 2 | 1 | 0 | 0 | 164 | 2 | 1 | 19 | 1 | 0 | 3 |
|                                               | CDM006 | lactose degradation               | 290 | 65.91 | 19 | 49 | 0 | 0 | 0 | 0 | 200 | 1 | 1 | 17 | 0 | 0 | 3 |
|                                               | CDM007 | lactose and galactose degradation | 18  | 4.09  | 12 | 0  | 0 | 0 | 0 | 0 | 6   | 0 | 0 | 0  | 0 | 0 | 0 |
|                                               | CDM008 | maltose degradation               | 26  | 5.91  | 0  | 5  | 0 | 0 | 0 | 0 | 21  | 0 | 0 | 0  | 0 | 0 | 0 |
|                                               | CDM009 | melibiose degradation             | 234 | 53.18 | 7  | 38 | 0 | 0 | 0 | 0 | 172 | 1 | 1 | 12 | 0 | 0 | 3 |
|                                               | CDM010 | sucrose degradation I             | 134 | 30.45 | 13 | 7  | 0 | 0 | 0 | 0 | 98  | 1 | 0 | 15 | 0 | 0 | 0 |
|                                               | CDM011 | sucrose degradation II            | 55  | 12.50 | 6  | 0  | 0 | 0 | 0 | 0 | 32  | 0 | 0 | 14 | 0 | 0 | 3 |
|                                               | CDM012 | trehalose degradation             | 67  | 15.23 | 1  | 4  | 0 | 0 | 0 | 0 | 46  | 1 | 1 | 14 | 0 | 0 | 0 |
|                                               | CDM013 | allose degradation                | 19  | 4.32  | 1  | 0  | 0 | 0 | 0 | 0 | 12  | 0 | 0 | 6  | 0 | 0 | 0 |

|        |                       |     |       |    |    |   |   |   |   |     |   |   |    |   |   |   |
|--------|-----------------------|-----|-------|----|----|---|---|---|---|-----|---|---|----|---|---|---|
| CDM014 | arabinose degradation | 126 | 28.64 | 5  | 20 | 0 | 0 | 0 | 0 | 86  | 0 | 1 | 14 | 0 | 0 | 0 |
| CDM015 | fructose degradation  | 237 | 53.86 | 17 | 0  | 0 | 0 | 0 | 0 | 201 | 2 | 0 | 16 | 1 | 0 | 0 |
| CDM016 | fucose degradation    | 58  | 13.14 | 0  | 0  | 0 | 0 | 0 | 0 | 41  | 2 | 1 | 11 | 0 | 0 | 3 |
| CDM017 | galactose degradation | 290 | 65.91 | 25 | 42 | 0 | 0 | 0 | 0 | 201 | 2 | 0 | 17 | 0 | 0 | 3 |
| CDM018 | mannose degradation   | 227 | 51.59 | 19 | 47 | 0 | 0 | 0 | 0 | 134 | 2 | 1 | 21 | 0 | 0 | 3 |
| CDM019 | rhamnose degradation  | 111 | 25.18 | 4  | 28 | 0 | 0 | 0 | 0 | 64  | 0 | 1 | 14 | 0 | 0 | 0 |
| CDM020 | ribose degradation    | 55  | 12.50 | 2  | 0  | 0 | 0 | 0 | 0 | 37  | 2 | 0 | 14 | 0 | 0 | 0 |
| CDM021 | xylose degradation    | 77  | 17.50 | 7  | 21 | 0 | 0 | 0 | 0 | 33  | 1 | 1 | 14 | 0 | 0 | 0 |

|                        |        |                                                            |     |       |    |    |   |   |   |   |     |   |   |    |   |   |   |
|------------------------|--------|------------------------------------------------------------|-----|-------|----|----|---|---|---|---|-----|---|---|----|---|---|---|
| Coronary heart disease | CHM010 | N-ACetyl-D-glucosamine 6-phosphate (GlcNAc-6-P) metabolism | 438 | 99.55 | 29 | 50 | 2 | 1 | 1 | 1 | 310 | 2 | 1 | 35 | 2 | 1 | 3 |
|                        | CHM002 | choline degradation I                                      | 11  | 2.50  | 1  | 0  | 0 | 0 | 0 | 0 | 0   | 0 | 0 | 10 | 0 | 0 | 0 |
|                        | CHM004 | choline degradation III                                    | 22  | 5.00  | 0  | 1  | 0 | 0 | 0 | 0 | 13  | 0 | 1 | 6  | 1 | 0 | 0 |
|                        | CHM006 | L-carnitine degradation II                                 | 4   | 0.91  | 1  | 0  | 0 | 0 | 0 | 0 | 3   | 0 | 0 | 0  | 0 | 0 | 0 |
|                        | CHM007 | L-carnitine degradation III                                | 6   | 1.36  | 0  | 0  | 0 | 0 | 0 | 0 | 0   | 0 | 0 | 6  | 0 | 0 | 0 |
|                        | CHM011 | creatine metabolism                                        | 75  | 17.05 | 7  | 9  | 0 | 0 | 0 | 0 | 47  | 1 | 0 | 9  | 2 | 0 | 0 |
|                        | CHM012 | mannitol metabolism                                        | 173 | 39.32 | 9  | 32 | 2 | 1 | 0 | 0 | 119 | 0 | 1 | 6  | 0 | 0 | 3 |
|                        | CHM013 | lysophosphatidylcholine metabolism                         | 267 | 60.68 | 12 | 17 | 0 | 0 | 1 | 0 | 218 | 1 | 0 | 18 | 0 | 0 | 0 |
|                        | CHM014 | Acetate synthesis I                                        | 415 | 94.24 | 28 | 49 | 0 | 0 | 1 | 0 | 302 | 2 | 1 | 26 | 2 | 1 | 3 |

| disease<br>modules<br>(CHM) |                                           |     |       |   |    |   |   |   |   |    |   |   |   |   |   |   |   |
|-----------------------------|-------------------------------------------|-----|-------|---|----|---|---|---|---|----|---|---|---|---|---|---|---|
|                             |                                           |     |       |   |    |   |   |   |   |    |   |   |   |   |   |   |   |
| CHM015                      | Acetate<br>synthesis II                   | 3   | 0.68  | 0 | 0  | 0 | 0 | 0 | 0 | 0  | 3 | 0 | 0 | 0 | 0 | 0 | 0 |
| CHM016                      | Acetate<br>synthesis III                  | 30  | 6.82  | 0 | 9  | 1 | 0 | 0 | 0 | 17 | 0 | 0 | 0 | 1 | 0 | 2 |   |
| CHM018                      | Propionate<br>synthesis I                 | 8   | 1.82  | 0 | 0  | 0 | 0 | 0 | 0 | 0  | 0 | 0 | 8 | 0 | 0 | 0 |   |
| CHM019                      | Butyrate<br>synthesis I                   | 105 | 23.86 | 0 | 34 | 0 | 0 | 1 | 0 | 67 | 1 | 0 | 1 | 1 | 0 | 0 |   |
| CHM020                      | Butyrate<br>synthesis II                  | 29  | 6.59  | 0 | 5  | 0 | 0 | 0 | 0 | 22 | 2 | 0 | 0 | 0 | 0 | 0 |   |
| CHM021                      | Propionate<br>synthesis II                | 48  | 10.91 | 1 | 0  | 0 | 0 | 0 | 0 | 40 | 2 | 0 | 4 | 1 | 0 | 0 |   |
| CHM022                      | Propionate<br>synthesis III               | 51  | 11.59 | 1 | 33 | 0 | 0 | 0 | 0 | 12 | 0 | 0 | 0 | 2 | 0 | 3 |   |
| CHM023                      | Secondary<br>bile acid<br>biosynthesis I  | 8   | 1.82  | 1 | 3  | 0 | 0 | 0 | 0 | 1  | 2 | 0 | 0 | 1 | 0 | 0 |   |
| CHM024                      | Secondary<br>bile acid<br>biosynthesis II | 26  | 5.91  | 2 | 0  | 0 | 0 | 0 | 0 | 24 | 0 | 0 | 0 | 0 | 0 | 0 |   |



|        |                        |     |       |    |    |   |   |   |   |     |   |   |    |   |   |   |
|--------|------------------------|-----|-------|----|----|---|---|---|---|-----|---|---|----|---|---|---|
| GBM001 | Serotonin synthesis I  | 4   | 0.91  | 0  | 0  | 0 | 0 | 0 | 0 | 4   | 0 | 0 | 0  | 0 | 0 | 0 |
| GBM003 | Melatonin synthesis    | 45  | 10.23 | 17 | 0  | 0 | 0 | 0 | 0 | 11  | 0 | 0 | 17 | 0 | 0 | 0 |
| GBM004 | Kynurenine synthesis   | 1   | 0.23  | 1  | 0  | 0 | 0 | 0 | 0 | 0   | 0 | 0 | 0  | 0 | 0 | 0 |
| GBM005 | Tryptophan synthesis   | 201 | 45.64 | 2  | 30 | 0 | 0 | 0 | 1 | 137 | 0 | 1 | 26 | 1 | 0 | 3 |
| GBM006 | Glutamate synthesis I  | 383 | 87.05 | 29 | 50 | 0 | 1 | 1 | 1 | 273 | 1 | 1 | 21 | 2 | 0 | 3 |
| GBM007 | Glutamate synthesis II | 390 | 88.64 | 28 | 51 | 2 | 1 | 1 | 0 | 270 | 2 | 1 | 29 | 2 | 0 | 3 |
| GBM009 | Histamine synthesis    | 7   | 1.59  | 3  | 2  | 0 | 0 | 0 | 0 | 1   | 1 | 0 | 0  | 0 | 0 | 0 |
| GBM010 | Histamine degradation  | 10  | 2.27  | 1  | 0  | 0 | 0 | 0 | 0 | 0   | 0 | 0 | 9  | 0 | 0 | 0 |

|        |                                                |     |       |   |    |   |   |   |   |     |   |   |    |   |   |   |
|--------|------------------------------------------------|-----|-------|---|----|---|---|---|---|-----|---|---|----|---|---|---|
| GBM011 | Cortisol degradation                           | 167 | 37.88 | 7 | 20 | 0 | 0 | 0 | 0 | 123 | 2 | 1 | 14 | 0 | 0 | 0 |
| GBM012 | Dopamine synthesis                             | 4   | 0.91  | 0 | 0  | 0 | 0 | 0 | 0 | 4   | 0 | 0 | 0  | 0 | 0 | 0 |
| GBM015 | p-Cresol synthesis                             | 224 | 50.91 | 5 | 32 | 1 | 1 | 1 | 0 | 144 | 2 | 1 | 32 | 2 | 0 | 3 |
| GBM016 | p-Cresol degradation                           | 6   | 1.36  | 1 | 0  | 0 | 0 | 0 | 0 | 0   | 0 | 0 | 5  | 0 | 0 | 0 |
| GBM017 | IPA synthesis (Clostridium sporogenes pathway) | 32  | 7.27  | 1 | 0  | 0 | 0 | 0 | 0 | 25  | 2 | 0 | 4  | 0 | 0 | 0 |
| GBM019 | GABA degradation                               | 61  | 13.86 | 6 | 0  | 0 | 0 | 0 | 0 | 39  | 0 | 0 | 15 | 1 | 0 | 0 |
| GBM020 | GABA synthesis I                               | 9   | 2.05  | 0 | 0  | 0 | 0 | 0 | 0 | 0   | 0 | 0 | 9  | 0 | 0 | 0 |
| GBM021 | GABA synthesis II                              | 13  | 2.95  | 0 | 0  | 0 | 0 | 0 | 0 | 0   | 0 | 0 | 13 | 0 | 0 | 0 |
| GBM022 | GABA synthesis III                             | 41  | 9.32  | 6 | 23 | 0 | 0 | 0 | 0 | 7   | 0 | 0 | 1  | 1 | 0 | 3 |

**Gut-brain  
metabolism**

|        |                                               |     |       |    |    |   |   |   |   |     |   |   |    |   |   |   |
|--------|-----------------------------------------------|-----|-------|----|----|---|---|---|---|-----|---|---|----|---|---|---|
| GBM023 | Dopamine degradation                          | 16  | 3.64  | 1  | 1  | 0 | 0 | 0 | 0 | 5   | 0 | 0 | 9  | 0 | 0 | 0 |
| GBM024 | DOPAC synthesis                               | 9   | 2.05  | 1  | 1  | 0 | 0 | 0 | 0 | 2   | 0 | 0 | 5  | 0 | 0 | 0 |
| GBM026 | Nitric oxide synthesis II (nitrite reductase) | 3   | 0.68  | 0  | 0  | 0 | 0 | 0 | 0 | 0   | 0 | 0 | 3  | 0 | 0 | 0 |
| GBM027 | Nitric oxide degradation I (NO dioxygenase)   | 33  | 7.50  | 0  | 1  | 0 | 0 | 0 | 0 | 7   | 1 | 0 | 24 | 0 | 0 | 0 |
| GBM028 | Nitric oxide degradation II (NO reductase)    | 4   | 0.91  | 0  | 0  | 0 | 0 | 0 | 0 | 1   | 0 | 0 | 3  | 0 | 0 | 0 |
| GBM029 | ClpB (ATP-dependent chaperone protein)        | 347 | 78.86 | 29 | 49 | 2 | 1 | 0 | 0 | 226 | 2 | 1 | 31 | 2 | 1 | 3 |
| GBM030 | Polysaccharide A                              | 15  | 3.41  | 0  | 6  | 0 | 0 | 0 | 0 | 9   | 0 | 0 | 0  | 0 | 0 | 0 |
| GBM031 | 17-beta-Estradiol degradation                 | 320 | 72.73 | 10 | 44 | 1 | 0 | 0 | 0 | 230 | 2 | 1 | 28 | 0 | 1 | 3 |
| GBM032 | Quinolinic acid synthesis                     | 218 | 49.55 | 20 | 48 | 2 | 1 | 1 | 1 | 123 | 1 | 1 | 17 | 0 | 0 | 3 |

**modules  
(GBM)**

|        |                                             |     |       |    |    |   |   |   |   |     |   |   |    |   |   |   |
|--------|---------------------------------------------|-----|-------|----|----|---|---|---|---|-----|---|---|----|---|---|---|
| GBM033 | Quinolinic acid degradation                 | 415 | 94.24 | 29 | 50 | 2 | 1 | 1 | 1 | 292 | 2 | 1 | 31 | 2 | 0 | 3 |
| GBM034 | Isovaleric acid synthesis I (KADH pathway)  | 3   | 0.68  | 0  | 1  | 0 | 0 | 0 | 0 | 2   | 0 | 0 | 0  | 0 | 0 | 0 |
| GBM035 | Isovaleric acid synthesis II (KADC pathway) | 126 | 28.56 | 22 | 10 | 1 | 0 | 0 | 0 | 80  | 0 | 1 | 11 | 1 | 0 | 0 |
| GBM036 | S-Adenosylmethionine (SAM) synthesis        | 411 | 93.41 | 27 | 48 | 1 | 1 | 1 | 1 | 288 | 2 | 1 | 35 | 2 | 1 | 3 |
| GBM037 | Inositol synthesis                          | 19  | 4.32  | 5  | 14 | 0 | 0 | 0 | 0 | 0   | 0 | 0 | 0  | 0 | 0 | 0 |
| GBM038 | Inositol degradation                        | 95  | 21.59 | 18 | 9  | 0 | 0 | 0 | 0 | 56  | 0 | 1 | 11 | 0 | 0 | 0 |
| GBM039 | g-Hydroxybutyric acid (GHB) degradation     | 50  | 11.36 | 1  | 4  | 1 | 0 | 0 | 0 | 34  | 0 | 0 | 9  | 1 | 0 | 0 |
| GBM040 | Menaquinone synthesis (vitamin K2) I        | 71  | 16.14 | 7  | 34 | 0 | 0 | 0 | 0 | 9   | 0 | 0 | 18 | 0 | 0 | 3 |
| GBM041 | vitamin K2 II                               | 8   | 1.82  | 0  | 7  | 0 | 0 | 0 | 0 | 0   | 0 | 0 | 1  | 0 | 0 | 0 |

|        |                                |     |       |    |    |   |   |   |   |     |   |   |    |   |   |   |
|--------|--------------------------------|-----|-------|----|----|---|---|---|---|-----|---|---|----|---|---|---|
| GBM042 | PUFAs synthesis (AA, EPA, DHA) | 275 | 62.50 | 4  | 24 | 1 | 0 | 1 | 0 | 206 | 1 | 1 | 35 | 2 | 0 | 0 |
| GBM043 | Acetate synthesis I            | 415 | 94.24 | 28 | 49 | 0 | 0 | 1 | 0 | 302 | 2 | 1 | 26 | 2 | 1 | 3 |
| GBM044 | Acetate synthesis II           | 3   | 0.68  | 0  | 0  | 0 | 0 | 0 | 0 | 3   | 0 | 0 | 0  | 0 | 0 | 0 |
| GBM045 | Acetate synthesis III          | 30  | 6.82  | 0  | 9  | 1 | 0 | 0 | 0 | 17  | 0 | 0 | 0  | 1 | 0 | 2 |
| GBM047 | Acetate degradation            | 116 | 26.36 | 5  | 29 | 0 | 0 | 0 | 1 | 65  | 0 | 1 | 15 | 0 | 0 | 0 |
| GBM048 | Propionate synthesis I         | 8   | 1.82  | 0  | 0  | 0 | 0 | 0 | 0 | 0   | 0 | 0 | 8  | 0 | 0 | 0 |
| GBM049 | Tryptophan degradation         | 41  | 9.32  | 0  | 15 | 0 | 0 | 0 | 0 | 18  | 0 | 0 | 5  | 0 | 0 | 3 |
| GBM050 | Glutamate degradation I        | 1   | 0.23  | 0  | 0  | 0 | 0 | 0 | 0 | 0   | 1 | 0 | 0  | 0 | 0 | 0 |
| GBM051 | Glutamate degradation II       | 21  | 4.77  | 0  | 0  | 0 | 0 | 0 | 0 | 13  | 2 | 0 | 6  | 0 | 0 | 0 |

|        |                                     |     |       |    |    |   |   |   |   |     |   |   |    |   |   |   |
|--------|-------------------------------------|-----|-------|----|----|---|---|---|---|-----|---|---|----|---|---|---|
| GBM052 | Butyrate synthesis I                | 105 | 23.86 | 0  | 34 | 0 | 0 | 1 | 0 | 67  | 1 | 0 | 1  | 1 | 0 | 0 |
| GBM053 | Butyrate synthesis II               | 29  | 6.59  | 0  | 5  | 0 | 0 | 0 | 0 | 22  | 2 | 0 | 0  | 0 | 0 | 0 |
| GBM054 | Propionate synthesis II             | 48  | 10.91 | 1  | 0  | 0 | 0 | 0 | 0 | 40  | 2 | 0 | 4  | 1 | 0 | 0 |
| GBM055 | Propionate synthesis III            | 51  | 11.59 | 1  | 33 | 0 | 0 | 0 | 0 | 12  | 0 | 0 | 0  | 2 | 0 | 3 |
| GBM056 | Propionate degradation I            | 5   | 1.14  | 0  | 0  | 0 | 0 | 0 | 0 | 0   | 0 | 0 | 5  | 0 | 0 | 0 |
| GBM057 | Corrinoid dependent enzymes         | 427 | 97.05 | 27 | 51 | 2 | 1 | 1 | 0 | 301 | 2 | 1 | 35 | 2 | 1 | 3 |
| GBM058 | Secondary bile acid biosynthesis I  | 8   | 1.82  | 1  | 3  | 0 | 0 | 0 | 0 | 1   | 2 | 0 | 0  | 1 | 0 | 0 |
| GBM059 | Secondary bile acid biosynthesis II | 26  | 5.91  | 2  | 0  | 0 | 0 | 0 | 0 | 24  | 0 | 0 | 0  | 0 | 0 | 0 |
