# Supplementary material for: Bifidobacterium lactis Probio-M8 Adjuvant Treatment Confers Added Benefits to Patients with Coronary Artery Disease via Target Modulation of the Gut-Heart/-Brain Axes
Source: PubMed Central journal article supplement (PMC9040731; doi:10.1128/msystems.00100-22), 2022-03-28
Supplement: msystems.00100-22-st007.pdf [file msystems.00100-22-st007.pdf]

Table S7. Significant differential gut bioactive metabolites identified between probiotic and placebo groups

| Probiotic group            |                   |          |          |          |          |          |                           |        |         |
|----------------------------|-------------------|----------|----------|----------|----------|----------|---------------------------|--------|---------|
| Differential metabolite    | Result statistics |          |          |          |          |          | Corrected P-value, T-test |        |         |
|                            | Mean pr           | Mean pr  | Mean pr  | SD pro   | SD pro   | SD pro   | pro 0d                    | pro 0d | pro 90d |
| Pseudouridine              | 5.00E-05          | 4.66E-05 | 4.87E-05 | 5.51E-06 | 3.55E-06 | 4.28E-06 | 0.03                      | 0.45   | 0.07    |
| Fructose glucose galactose | 1.39E-04          | 1.33E-04 | 1.35E-04 | 9.92E-06 | 8.28E-06 | 9.30E-06 | 0.04                      | 0.24   | 0.60    |

| placebo group           |                   |          |          |          |          |          |                           |           |         |
|-------------------------|-------------------|----------|----------|----------|----------|----------|---------------------------|-----------|---------|
| Differential metabolite | Result statistics |          |          |          |          |          | Corrected P-value, T-test |           |         |
|                         | Mean pl           | Mean pl  | Mean pl  | SD pla   | SD pla   | SD pla   | pla 0d vs                 | pla 0d vs | pla 90d |
| Sebacate                | 1.20E-04          | 1.29E-04 | 1.02E-04 | 4.10E-05 | 4.51E-05 | 3.06E-05 | 0.61                      | 0.15      | 0.05    |

| Between the probiotic and placebo groups |              |               |                |              |               |                |            |             |              |            |             |              | Corrected P-value, |            |              |
|------------------------------------------|--------------|---------------|----------------|--------------|---------------|----------------|------------|-------------|--------------|------------|-------------|--------------|--------------------|------------|--------------|
| Differential metabolite                  | Mean_pr o 0d | Mean_pr o 90d | Mean_pr o 180d | Mean_pl a 0d | Mean_pl a 90d | Mean_pl a 180d | SD_pro_ 0d | SD_pro_ 90d | SD_pro_ 180d | SD_pla_0 d | SD_pla_9 0d | SD_pla_1 80d | pro_0d vs          | pro_90d vs | pro_180 d vs |
| X3 methylxanthine                        | 3.11E-05     | 3.17E-05      | 3.13E-05       | 2.77E-05     | 2.73E-05      | 2.86E-05       | 7.55E-06   | 4.44E-06    | 5.25E-06     | 5.45E-06   | 6.59E-06    | 5.52E-06     | 0.13               | 0.02       | 0.19         |
| C20:4 carnitine                          | 1.20E-04     | 1.12E-04      | 1.11E-04       | 1.24E-04     | 1.27E-04      | 1.13E-04       | 3.32E-05   | 2.15E-05    | 2.86E-05     | 3.24E-05   | 3.05E-05    | 2.39E-05     | 0.47               | 0.04       | 0.63         |
| Cytosine                                 | 2.95E-05     | 3.34E-05      | 3.17E-05       | 2.44E-05     | 2.26E-05      | 2.34E-05       | 1.18E-05   | 1.72E-05    | 1.22E-05     | 1.04E-05   | 9.95E-06    | 9.91E-06     | 0.20               | 0.05       | 0.04         |
| Malonate                                 | 7.19E-05     | 6.95E-05      | 7.31E-05       | 6.58E-05     | 6.72E-05      | 6.59E-05       | 1.08E-05   | 8.47E-06    | 8.78E-06     | 5.05E-06   | 5.63E-06    | 5.28E-06     | 0.24               | 0.35       | 0.01         |
| Palmitoyl glycerol                       | 7.21E-05     | 7.22E-05      | 7.34E-05       | 7.00E-05     | 7.02E-05      | 7.07E-05       | 4.71E-06   | 4.23E-06    | 4.25E-06     | 3.34E-06   | 2.73E-06    | 2.75E-06     | 0.23               | 0.15       | 0.03         |
