# Supplementary material for: Bifidobacterium lactis Probio-M8 Adjuvant Treatment Confers Added Benefits to Patients with Coronary Artery Disease via Target Modulation of the Gut-Heart/-Brain Axes
Source: PubMed Central journal article supplement (PMC9040731; doi:10.1128/msystems.00100-22), 2022-03-28
Supplement: msystems.00100-22-st008.pdf [file msystems.00100-22-st008.pdf]

Table S8. Differential serum metabolites identified by LC-MS

| Serum metabolites (ng/ul) | Between the probiotic and placebo groups |              |               |             |              |               |           |            |             |           |            |             | Corrected P-value, Wilcoxon-test |                    |                      |
|---------------------------|------------------------------------------|--------------|---------------|-------------|--------------|---------------|-----------|------------|-------------|-----------|------------|-------------|----------------------------------|--------------------|----------------------|
|                           | Mean_pro_0d                              | Mean_pro_90d | Mean_pro_180d | Mean_pla_0d | Mean_pla_90d | Mean_pla_180d | SD_pro_0d | SD_pro_90d | SD_pro_180d | SD_pla_0d | SD_pla_90d | SD_pla_180d | pro_0d vs pla_0d                 | pro_90d vs pla_90d | pro_180d vs pla_180d |
| TMAO                      | 44.05                                    | 48.98        | 34.08         | 64.32       | 68.34        | 79.73         | 28.60     | 32.11      | 14.76       | 44.59     | 41.70      | 56.49       | 1.00                             | 0.52               | 0.03                 |
| L-Leucine                 | 999.05                                   | 935.83       | 986.09        | 1081.68     | 1243.24      | 1386.87       | 438.12    | 452.31     | 484.21      | 481.69    | 576.90     | 525.54      | 1.000                            | 0.060              | 0.019                |
| L-Valine                  | 1817.01                                  | 1684.75      | 1702.54       | 1660.63     | 1902.44      | 2079.87       | 467.36    | 422.03     | 318.55      | 797.54    | 724.14     | 492.36      | 1.000                            | 1.000              | 0.017                |
| L-Serine                  | 33.58                                    | 32.84        | 42.63         | 30.12       | 34.89        | 29.47         | 15.75     | 15.44      | 14.07       | 14.58     | 22.31      | 16.22       | 1.000                            | 1.000              | 0.008                |
| L-Glycine                 | 67.01                                    | 73.30        | 89.75         | 54.27       | 51.31        | 48.61         | 22.17     | 20.76      | 31.45       | 22.55     | 20.11      | 17.11       | 0.280                            | 0.009              | 0.008                |
| L-Cysteine                | 11.74                                    | 11.68        | 11.53         | 12.83       | 13.47        | 13.21         | 1.30      | 1.69       | 1.63        | 1.66      | 2.21       | 2.21        | 0.370                            | 0.007              | 0.004                |
| L-Arginine                | 132.68                                   | 118.96       | 113.22        | 206.88      | 212.05       | 218.17        | 83.20     | 90.49      | 131.93      | 145.17    | 148.86     | 161.29      | 0.650                            | 0.037              | 0.004                |

| Probiotic group           |                   |              |               |           |            |             |                           |                    |                     |
|---------------------------|-------------------|--------------|---------------|-----------|------------|-------------|---------------------------|--------------------|---------------------|
| Serum metabolites (ng/ul) | Result statistics |              |               |           |            |             | Corrected P-value, T-test |                    |                     |
|                           | Mean_pro_0d       | Mean_pro_90d | Mean_pro_180d | SD_pro_0d | SD_pro_90d | SD_pro_180d | pro_0d vs pro_90d         | pro_0d vs pro_180d | pro_90d vs pro_180d |
| TMA                       | 49.62             | 47.24        | 48.81         | 4.93      | 4.85       | 4.89        | 0.01                      | 0.53               | 0.41                |
| -Methionin                | 189.42            | 169.08       | 186.73        | 42.15     | 39.86      | 39.41       | 0.046                     | 0.800              | 0.140               |
| -Asparagir                | 44.13             | 38.99        | 45.56         | 13.67     | 13.06      | 12.67       | 0.100                     | 0.520              | 0.030               |

| Placebo group             |                   |              |               |           |            |             |                           |                    |                     |
|---------------------------|-------------------|--------------|---------------|-----------|------------|-------------|---------------------------|--------------------|---------------------|
| Serum metabolites (ng/ul) | Result statistics |              |               |           |            |             | Corrected P-value, T-test |                    |                     |
|                           | Mean_pro_0d       | Mean_pro_90d | Mean_pro_180d | SD_pro_0d | SD_pro_90d | SD_pro_180d | pro_0d vs pro_90d         | pro_0d vs pro_180d | pro_90d vs pro_180d |

| Serum metabolites (ng/ul) | Mean_pla_0d | Mean_pla_90d | Mean_pla_180d | SD_pla_0d | SD_pla_90d | SD_pla_180d | pla_0d vs pla_90d | pla_0d vs pla_180d | pla_90d vs pla_180d |
|---------------------------|-------------|--------------|---------------|-----------|------------|-------------|-------------------|--------------------|---------------------|
| -Methionin                | 174.69      | 211.22       | 187.56        | 95.37     | 93.15      | 103.49      | 0.040             | 0.480              | 0.310               |
| -Kynurenin                | 15.36       | 20.22        | 25.89         | 12.02     | 11.51      | 19.09       | 0.048             | 0.042              | 0.240               |
